# Supplementary material for: Biologically active drimane derivatives isolated from submerged cultures of the wood-inhabiting basidiomycete Dentipellis fragilis
Source: PubMed Central journal article supplement — RSC Adv. 2023 Aug 31;13(37):25752–61. doi: 10.1039/d3ra04204a (PMC10468952; doi:10.1039/d3ra04204a), 2023-08-31
Supplement: RA-013-D3RA04204A-s001.pdf [file RA-013-D3RA04204A-s001.pdf]

## Supporting Information

### Biologically active drimane derivatives isolated from submerged cultures of the wood-inhabiting basidiomycete *Dentipellis fragilis*

**Nico Mitschke<sup>1,2,†,\*</sup>, Winnie Sum Chemutai<sup>1,3,†</sup>, Khadija Hassan<sup>1,3</sup>, Marco Kirchenwitz<sup>4</sup>, Hedda Schrey<sup>1</sup>, Luca Gerhards<sup>5</sup>, Harald Kellner<sup>6</sup>, Theresia E. B. Stradal<sup>4</sup>, Josphat C. Matasyoh<sup>7</sup> and Marc Stadler<sup>1,3\*</sup>**

1 Department of Microbial Drugs, Helmholtz Centre for Infection Research GmbH, Inhoffenstrasse 7, 38124 Braunschweig, Germany; [winnie.sumchemutai@helmholtz-hzi.de](mailto:winnie.sumchemutai@helmholtz-hzi.de), [khadija.hassan@helmholtz-hzi.de](mailto:khadija.hassan@helmholtz-hzi.de), [hedda.schrey@helmholtz-hzi.de](mailto:hedda.schrey@helmholtz-hzi.de), [marc.stadler@helmholtz-hzi.de](mailto:marc.stadler@helmholtz-hzi.de)

2 Current address: Research Group for Marine Geochemistry (ICBM-MPI Bridging Group), Institute for Chemistry and Biology of the Marine Environment (ICBM), Carl von Ossietzky Universität Oldenburg, Carl-von-Ossietzky-Str. 9-11, 26129 Oldenburg, Germany; [nico.mitschke@uni-oldenburg.de](mailto:nico.mitschke@uni-oldenburg.de)

3 Institute of Microbiology, Technische Universität Braunschweig, Spielmannstraße 7, 38106 Braunschweig, Germany

4 Department of Cell Biology, Helmholtz Centre for Infection Research, Inhoffenstrasse 7, 38124 Braunschweig, Germany; [marco.kirchenwitz@helmholtz-hzi.de](mailto:marco.kirchenwitz@helmholtz-hzi.de), [theresia.stradal@helmholtz-hzi.de](mailto:theresia.stradal@helmholtz-hzi.de)

5 Department of Physics, Carl von Ossietzky Universität Oldenburg, Carl-von-Ossietzky-Str. 9-11, 26129 Oldenburg, Germany; [luca.gerhards@uol.de](mailto:luca.gerhards@uol.de)

6 Department of Bio- and Environmental Sciences, Technische Universität Dresden - International Institute Zittau, Markt 23, 02763 Zittau, Germany; [harald.kellner@tu-dresden.de](mailto:harald.kellner@tu-dresden.de)

7 Department of Chemistry, Egerton University, P.O. Box 536, 20115, Njoro, Kenya; [jmatasyoh@egerton.ac.ke](mailto:jmatasyoh@egerton.ac.ke)

†N.M. and W.C.S. contributed equally to this paper

\*Correspondence: [nico.mitschke@uni-oldenburg.de](mailto:nico.mitschke@uni-oldenburg.de), [marc.stadler@helmholtz-hzi.de](mailto:marc.stadler@helmholtz-hzi.de)

## Table of Contents

|                                        |    |
|----------------------------------------|----|
| (1) Antimicrobial assays.....          | 3  |
| (2) Cytotoxicity assays.....           | 3  |
| (3) Neurite outgrowth assays.....      | 4  |
| (4) Analytical data of compound 1..... | 6  |
| (5) Analytical data of compound 2..... | 11 |
| (6) Analytical data of compound 3..... | 16 |
| (7) Analytical data of compound 4..... | 21 |
| (8) Analytical data of compound 5..... | 30 |
| (9) Analytical data of compound 6..... | 35 |

## (1) Antimicrobial assays

**Table S1:** Antibacterial activities of compounds 1–6.

| Microorganism                                    | MIC ( $\mu\text{g/mL}$ ) |    |      |      |      |    | Ref.              |
|--------------------------------------------------|--------------------------|----|------|------|------|----|-------------------|
|                                                  | 1                        | 2  | 3    | 4    | 5    | 6  |                   |
| <i>Bacillus subtilis</i> (DSM 10)                | n.i.                     | ND | n.i. | n.i. | n.i. | ND | 4.2 <sup>a</sup>  |
| <i>Mycolicibacterium smegmatis</i> (ATCC 700084) | n.i.                     | ND | n.i. | n.i. | n.i. | ND | 1.7 <sup>b</sup>  |
| <i>Staphylococcus aureus</i> (DSM 346)           | n.i.                     | ND | 66.7 | n.i. | n.i. | ND | 0.20 <sup>a</sup> |
| <i>Actinobacter baumannii</i> (DSM 30008)        | n.i.                     | ND | n.i. | n.i. | n.i. | ND | 0.26 <sup>c</sup> |
| <i>Chromobacterium violaceum</i> (DSM 30191)     | n.i.                     | ND | n.i. | n.i. | n.i. | ND | 0.83 <sup>a</sup> |
| <i>Escherichia coli</i> (DSM 1116)               | n.i.                     | ND | n.i. | n.i. | n.i. | ND | 3.3 <sup>a</sup>  |
| <i>Pseudomonas aeruginosa</i> (DSM PA14)         | n.i.                     | ND | n.i. | n.i. | n.i. | ND | 0.42 <sup>d</sup> |

n.i.: no inhibition, ND: not tested, Ref.: reference (<sup>a</sup>: oxytetracycline, 2 mg/mL; <sup>b</sup>: kanamycin 2 mg/mL; <sup>c</sup>: ciprofloxacin, 2.5 mg/mL; <sup>d</sup>: gentamycin, 2 mg/mL).

**Table S2:** Antifungal activities of compounds 1–6.

| Microorganism                                | MIC ( $\mu\text{g/mL}$ ) |    |      |      |      |      | Ref. |
|----------------------------------------------|--------------------------|----|------|------|------|------|------|
|                                              | 1                        | 2  | 3    | 4    | 5    | 6    |      |
| <i>Candida albicans</i> (DSM 1665)           | n.i.                     | ND | n.i. | n.i. | n.i. | n.i. | 8.3  |
| <i>Pichia anomala</i> (DSM 6766)             | n.i.                     | ND | n.i. | n.i. | n.i. | n.i. | 8.3  |
| <i>Rhodotorula glutinis</i> (DSM 10134)      | n.i.                     | ND | n.i. | n.i. | n.i. | n.i. | 2.1  |
| <i>Schizosaccharomyces pombe</i> (DSM 70572) | n.i.                     | ND | n.i. | n.i. | n.i. | n.i. | 4.2  |
| <i>Mucor hiemalis</i> (DSM 2656)             | n.i.                     | ND | 66.7 | n.i. | n.i. | n.i. | 4.2  |

n.i.: no inhibition, ND: not tested, Ref.: reference (nystatin, 20 mg/mL).

## (2) Cytotoxicity assays

**Table S3:** Cytotoxic activities of compounds 1–6.

| Cell line      | IC <sub>50</sub> ( $\mu\text{M}$ ) |       |      |      |      |      | Ref.                 |
|----------------|------------------------------------|-------|------|------|------|------|----------------------|
|                | 1                                  | 2     | 3    | 4    | 5    | 6    |                      |
| L929 (ACC2)    | n.c.                               | ND    | 93.5 | n.c. | n.c. | n.c. | 4.7×10 <sup>-5</sup> |
| KB3.1 (ACC158) | n.c.                               | 121.0 | 21.2 | n.c. | n.c. | n.c. | 3.3×10 <sup>-5</sup> |

n.c.: no cytotoxicity, ND: not tested, Ref.: reference (epothilon B).

### (3) Neurite outgrowth assays

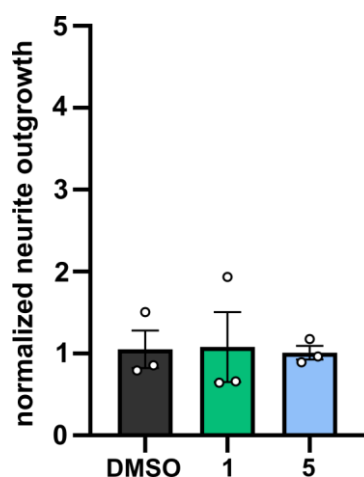

**Figure S1:** Bar chart displaying the normalized neurite outgrowth of PC-12 cells that were solely treated with either DMSO (5  $\mu\text{g}/\text{mL}$ ), compound **1** (5  $\mu\text{g}/\text{mL}$ ) or compound **5** (5  $\mu\text{g}/\text{mL}$ ) for 24 h. Neurite outgrowths were normalized with respect to the neurite outgrowths detected after 0 h ( $t_0$ ) and are given in fold changes  $\pm$  S.E.M. Data originates from three independent experiments.

**Table S4:** Normalized values of the individual neurite outgrowth assays as well as their mean and S.E.M. used for the illustrations in Figure 5 and Figure S1.

| Neurite outgrowth assays supplemented with NGF (5 ng/mL) as displayed in Figure 5 |                      |                         |                         |
|-----------------------------------------------------------------------------------|----------------------|-------------------------|-------------------------|
| Experiment                                                                        | DMSO + NGF (5 ng/mL) | compound <b>1</b> + NGF | compound <b>5</b> + NGF |
| 1                                                                                 | 1.09                 | 3.69                    | 4.25                    |
| 2                                                                                 | 1.26                 | 3.64                    | 3.31                    |
| 3                                                                                 | 2.02                 | 3.95                    | 2.87                    |
| Mean                                                                              | 1.46                 | 3.76                    | 3.48                    |
| S.E.M.                                                                            | 0.29                 | 0.10                    | 0.41                    |

  

| Neurite outgrowth assays not supplemented with NGF as displayed in Figure S1 |      |                   |                   |
|------------------------------------------------------------------------------|------|-------------------|-------------------|
| Experiment                                                                   | DMSO | compound <b>1</b> | compound <b>5</b> |
| 1                                                                            | 0.86 | 0.66              | 1.18              |
| 2                                                                            | 1.51 | 1.93              | 0.97              |
| 3                                                                            | 0.79 | 0.64              | 0.89              |
| Mean                                                                         | 1.05 | 1.08              | 1.01              |
| S.E.M.                                                                       | 0.23 | 0.43              | 0.08              |

#### (4) RT-qPCR assays

**Table S5:** Normalized values for NGF and BDNF mRNA levels as determined by RT-qPCR as well as their respective mean and S.E.M. used for the illustration in Figure 6.

| Experiment | DMSO                | compound 1      |                | compound 5      |                |
|------------|---------------------|-----------------|----------------|-----------------|----------------|
|            | BDNF/NGF expression | BDNF expression | NGF expression | BDNF expression | NGF expression |
| 1          | 1.00                | 3.29            | 1.20           | 3.16            | 1.67           |
| 2          | 1.00                | 2.19            | 7.35           | 1.30            | 2.06           |
| 2          | 1.00                | 4.25            | 3.29           | 3.27            | 1.09           |
| Mean       | 1.00                | 3.24            | 3.95           | 2.58            | 1.61           |
| S.E.M.     | 0.00                | 0.60            | 1.81           | 0.64            | 0.28           |

**(5) Analytical data of compound 1**

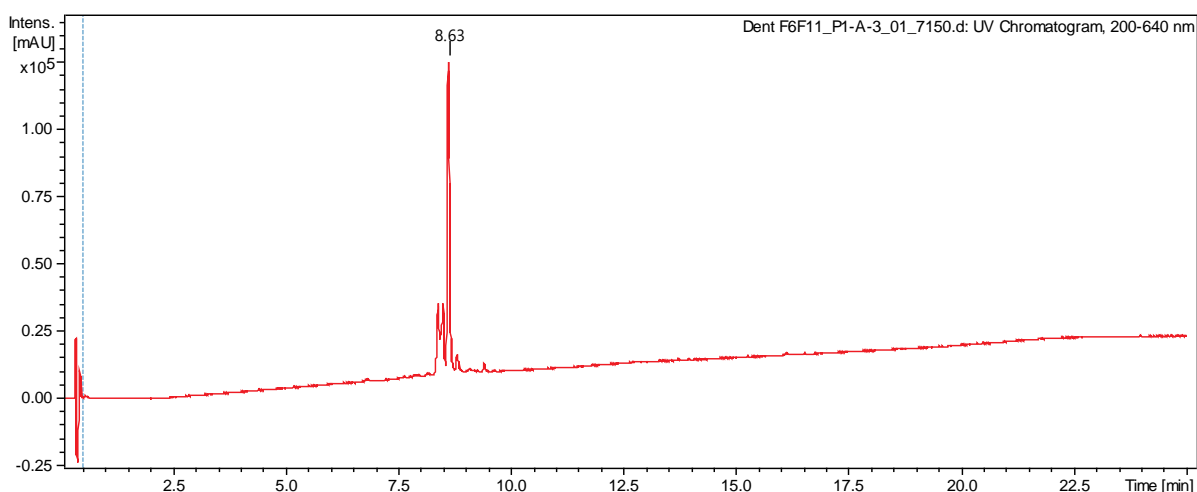

**Figure S1:** HPLC-DAD chromatogram of compound 1.

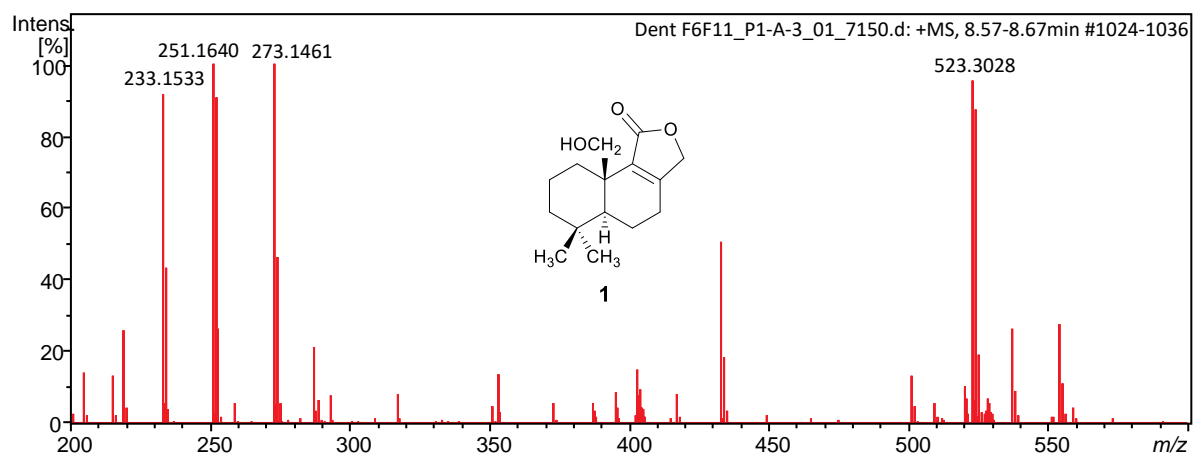

**Figure S2:** HR-(+)ESIMS spectrum of compound 1.

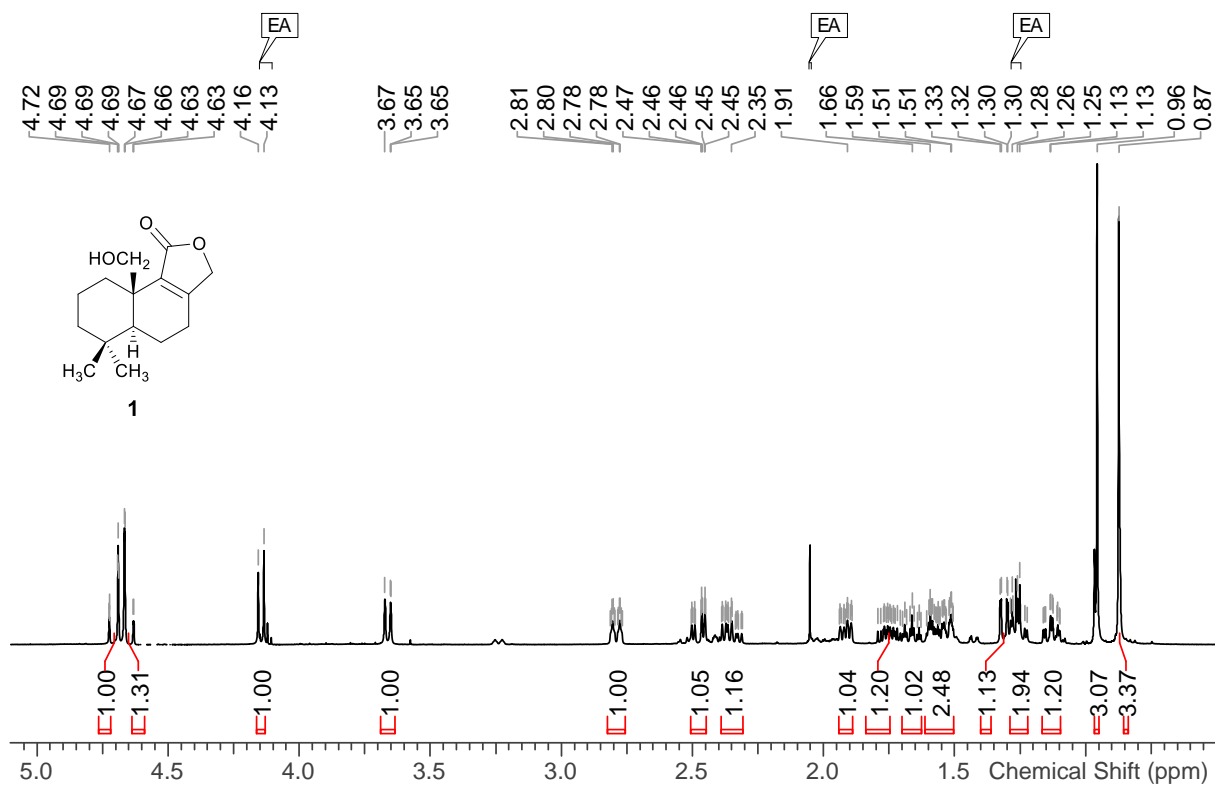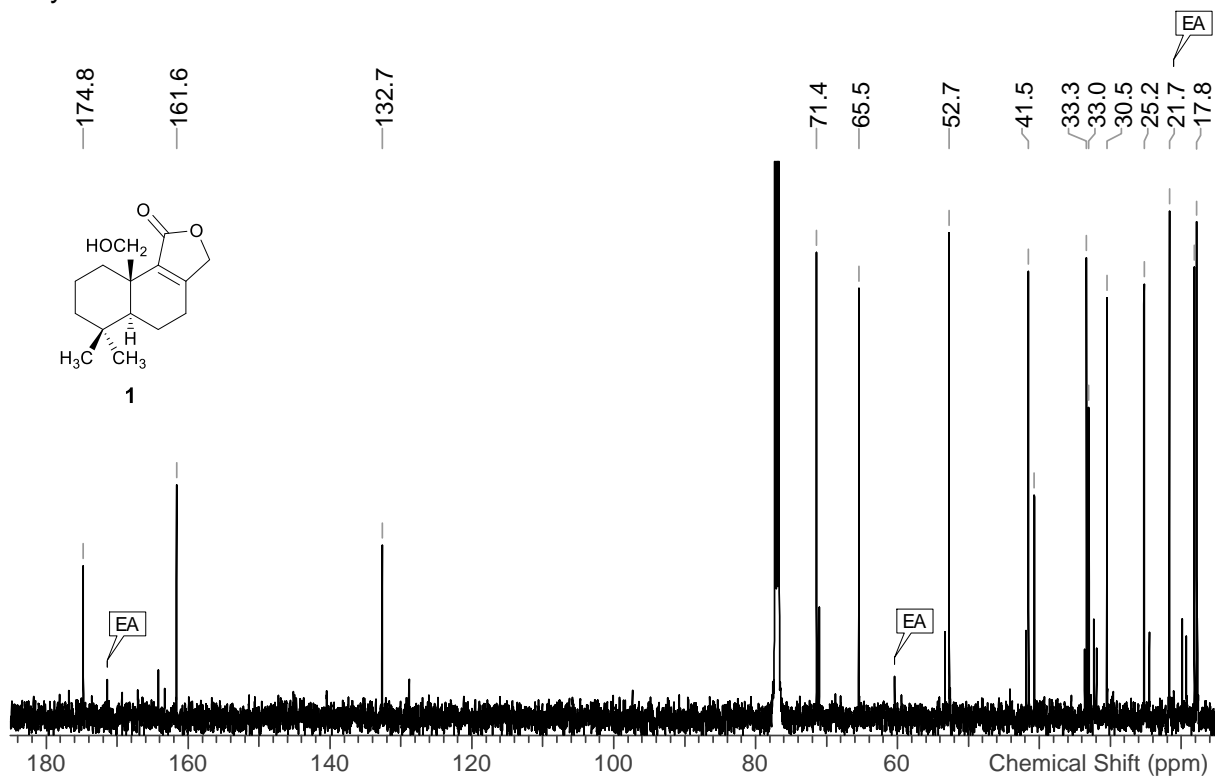

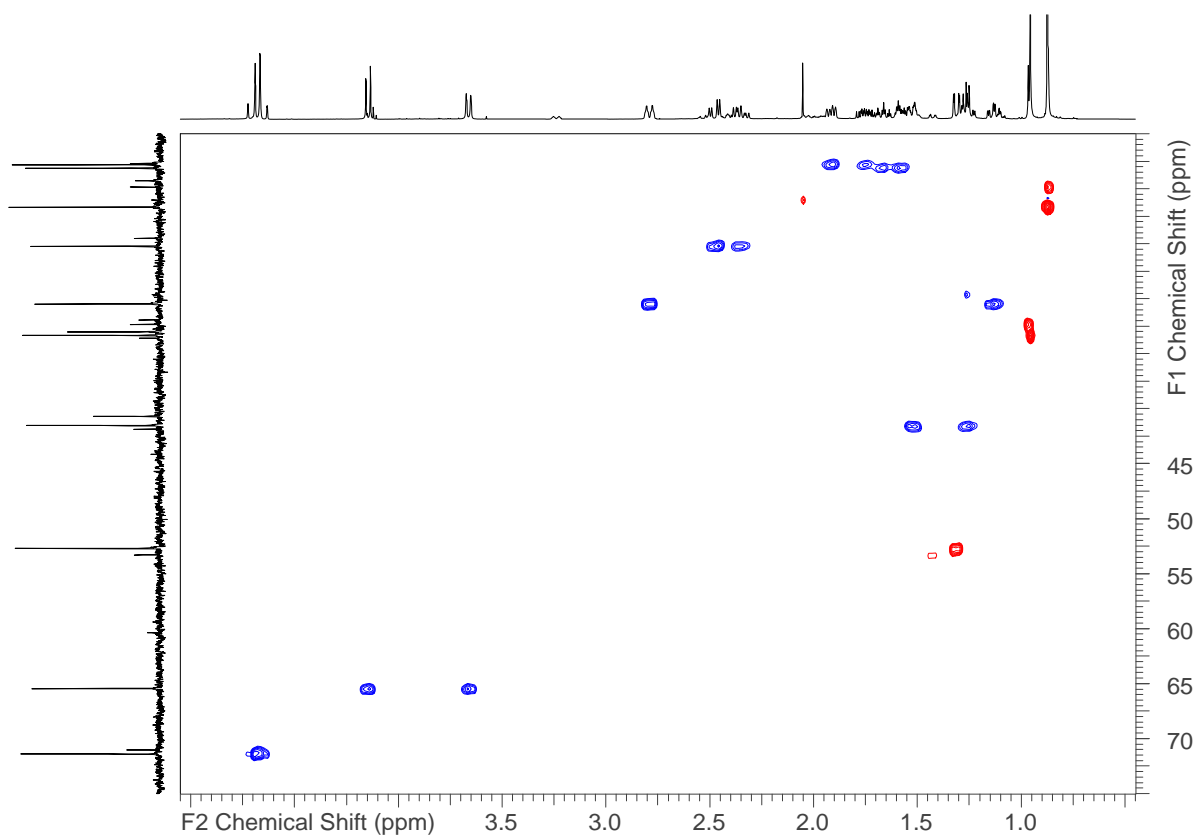

**Figure S5:**  $^1\text{H}$ ,  $^{13}\text{C}$  DEPT-HSQC spectrum (500 MHz,  $\text{CDCl}_3$ , 298 K) of the purified compound 1.

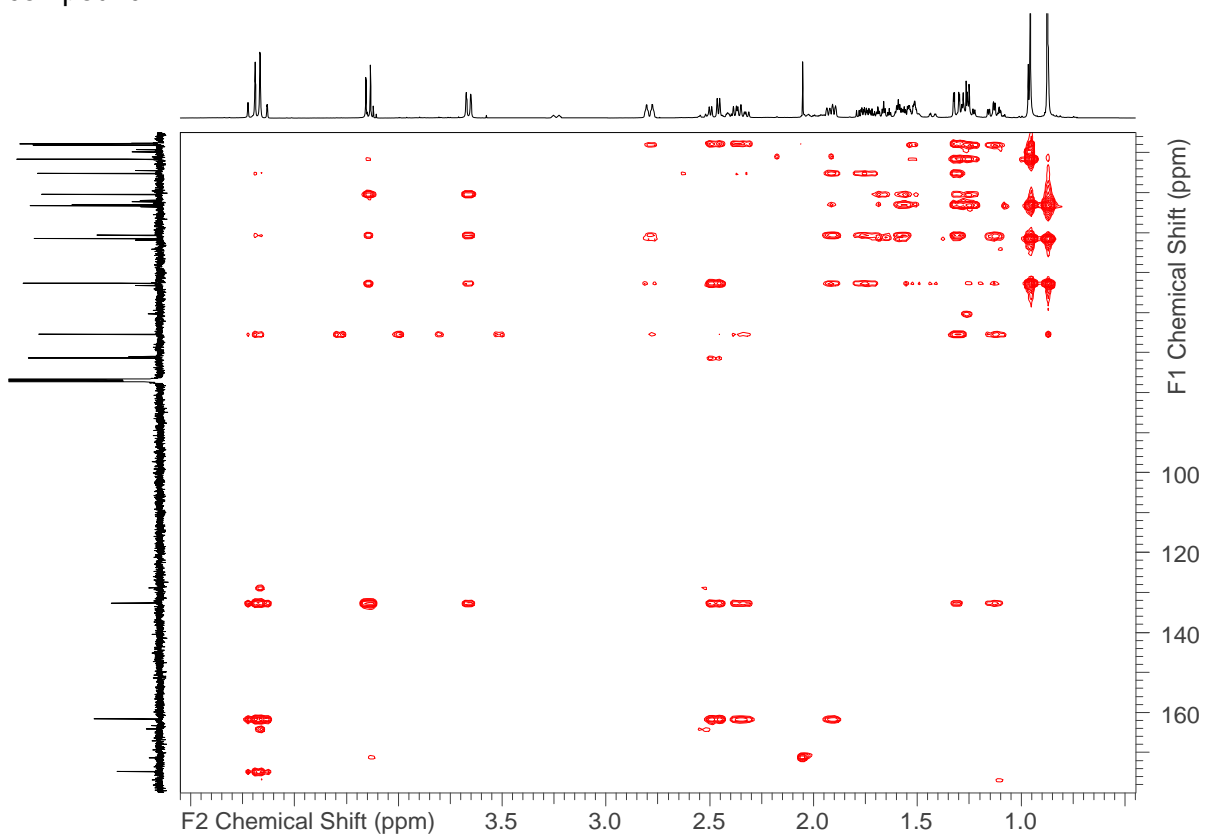

**Figure S6:**  $^1\text{H}$ ,  $^{13}\text{C}$  HMBC spectrum (500 MHz,  $\text{CDCl}_3$ , 298 K) of the purified compound 1.



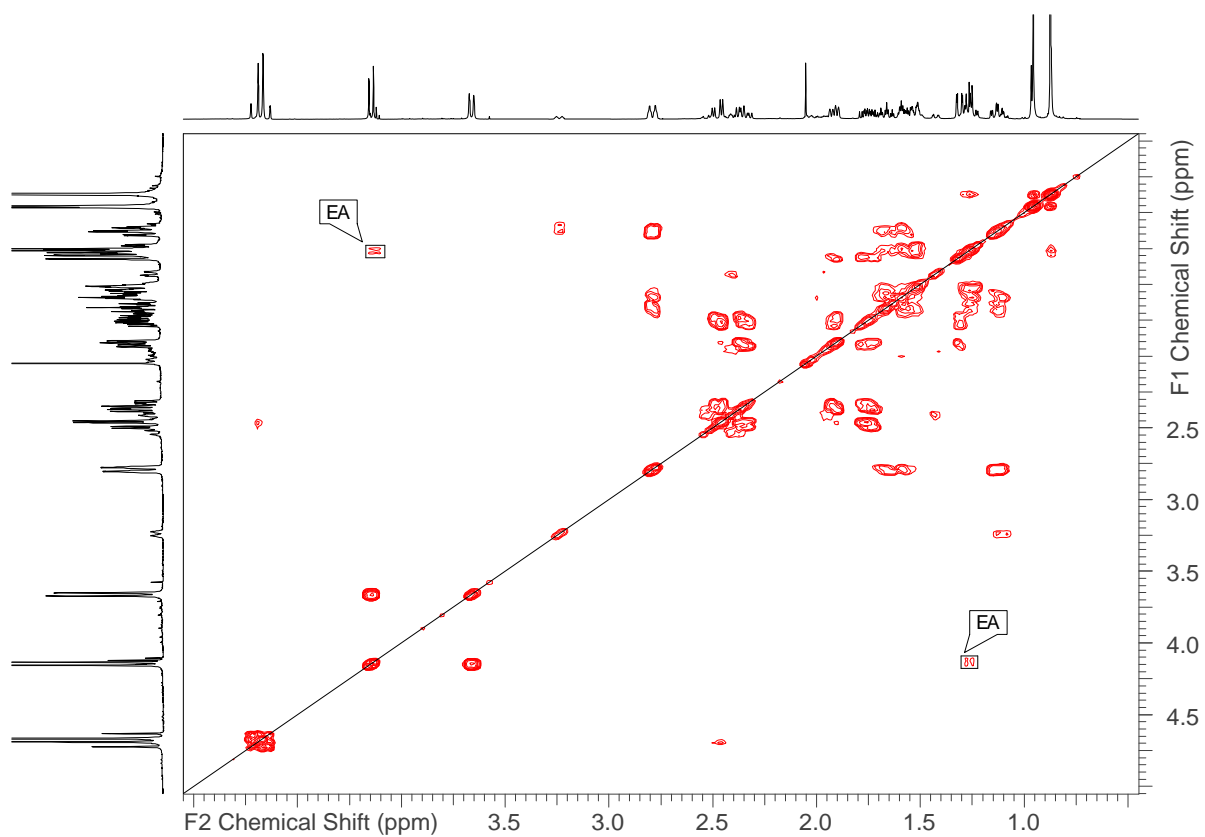

**Figure S7:**  $^1\text{H},^1\text{H}$  COSY spectrum (500 MHz,  $\text{CDCl}_3$ , 298 K) of the purified compound **1**. EA: ethyl acetate.

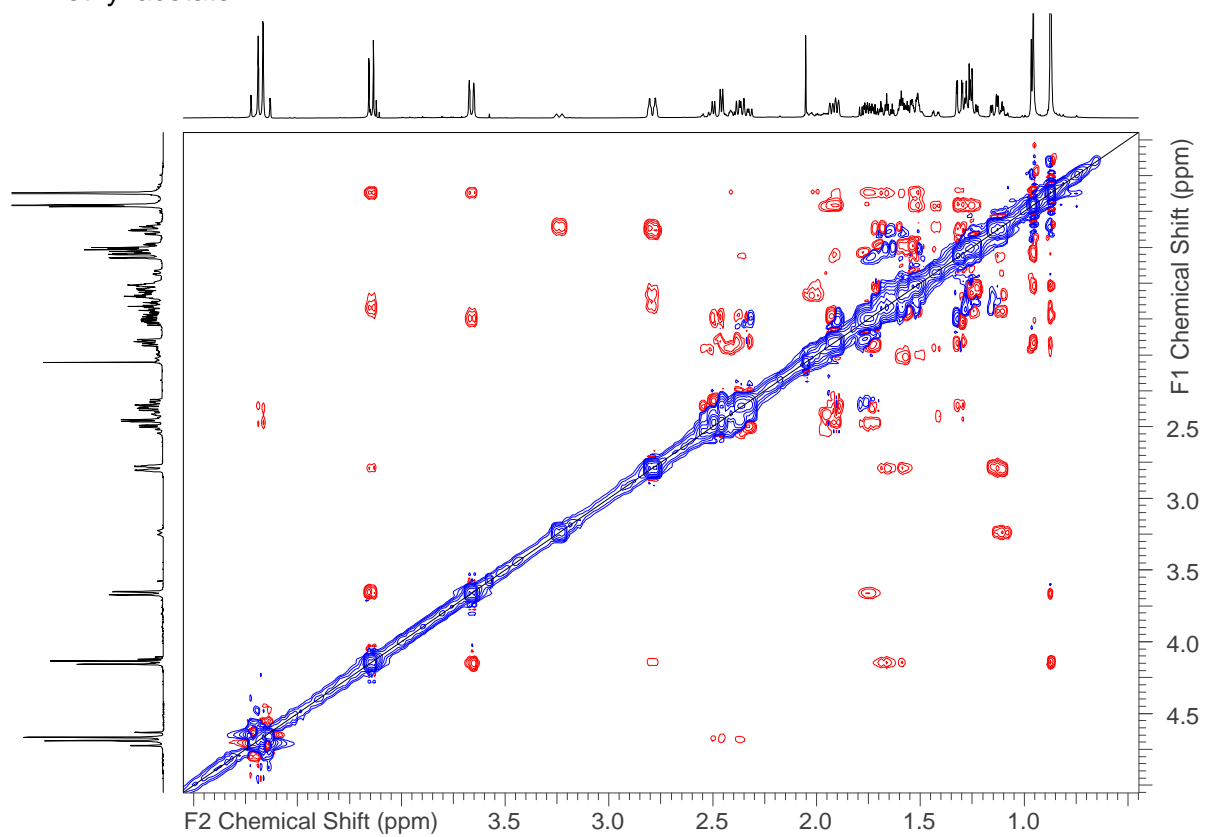

**Figure S8:**  $^1\text{H},^1\text{H}$  ROESY spectrum (500 MHz,  $\text{CDCl}_3$ , 298 K) of the purified compound **1**.

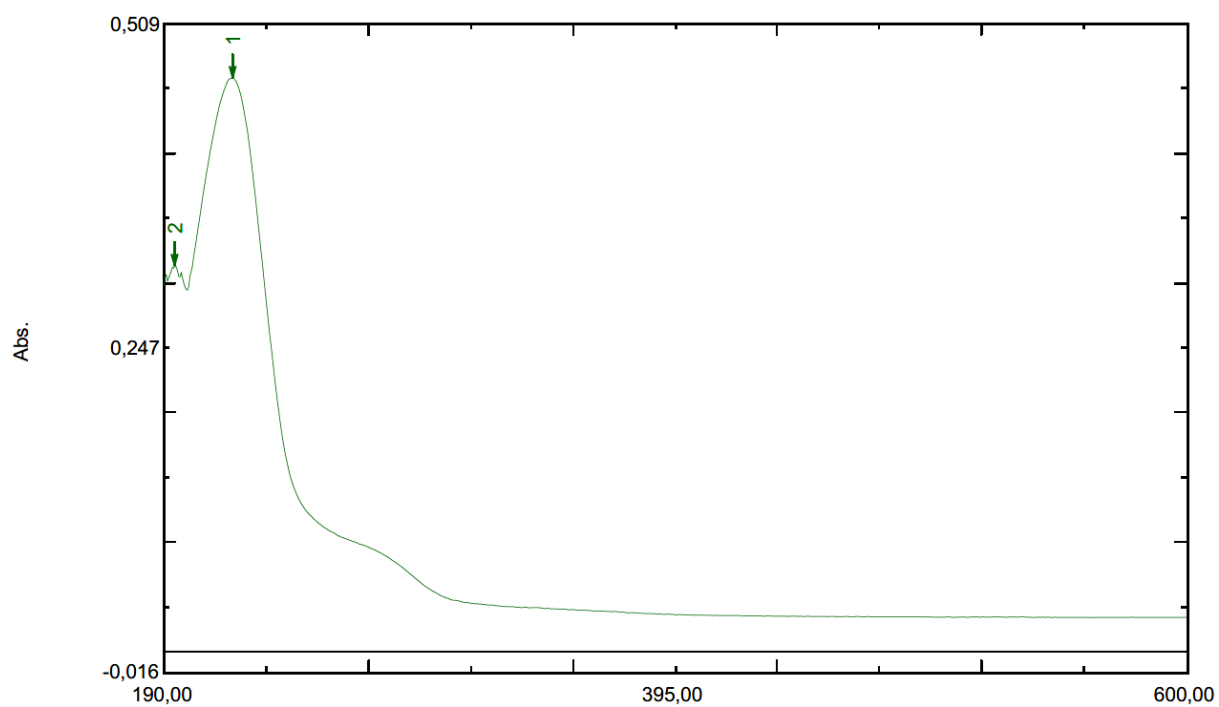

**Figure S9:** UV/Vis spectrum of compound **1** in MeOH.

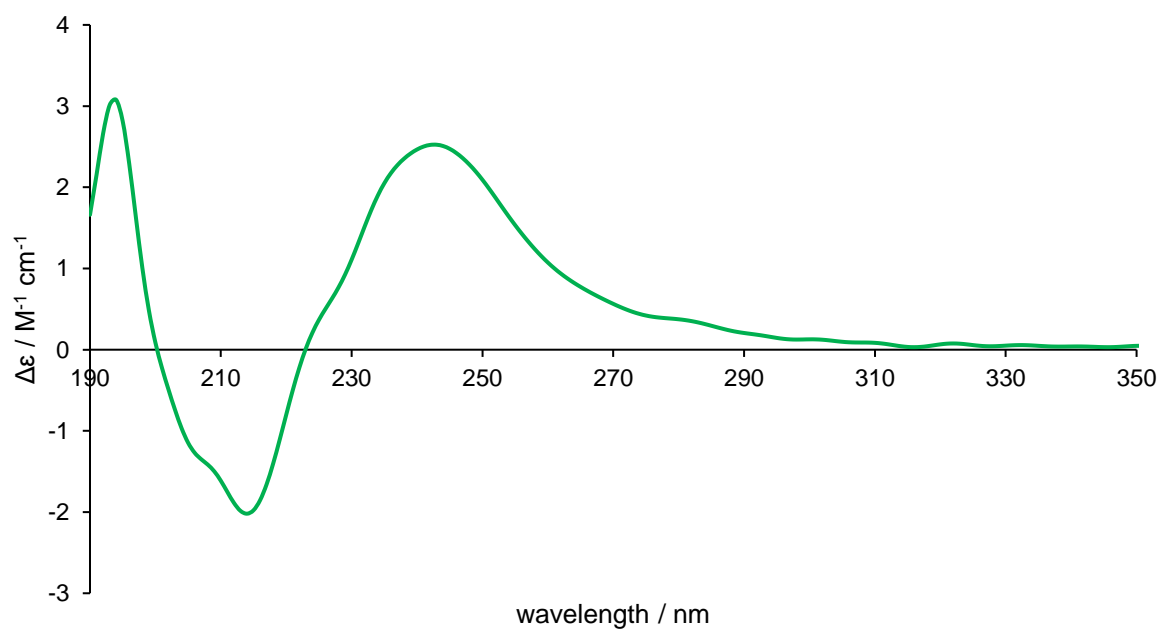

**Figure S10:** ECD spectrum of compound **1** in MeOH.

**(6) Analytical data of compound 2**

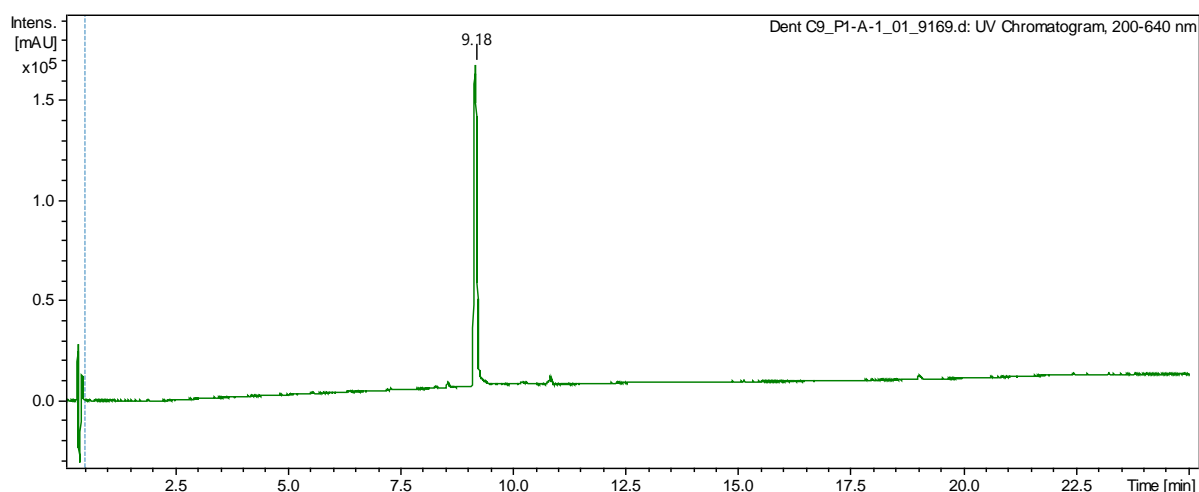

**Figure S11:** HPLC-DAD chromatogram of compound 2.

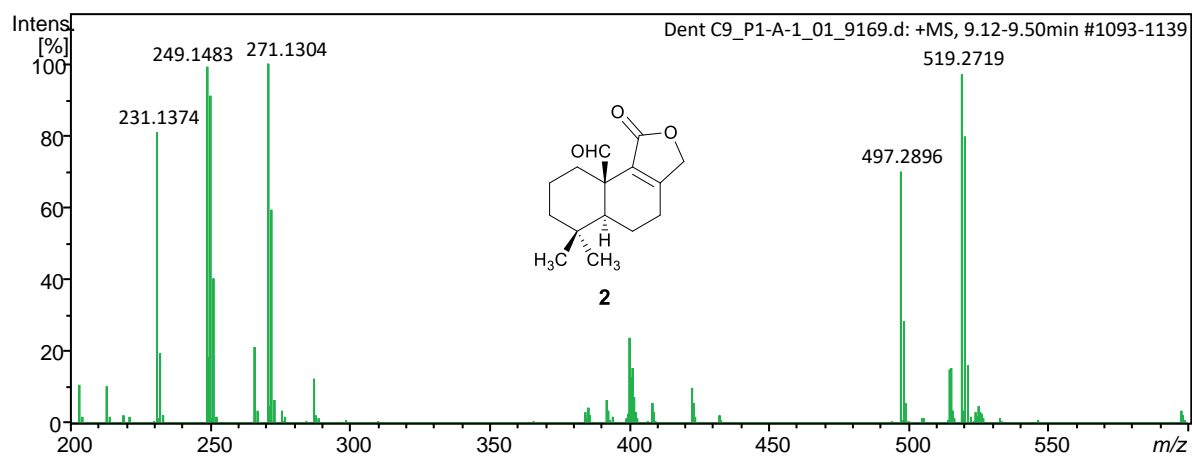

**Figure S12:** HR-(+)ESIMS spectrum of compound 2.

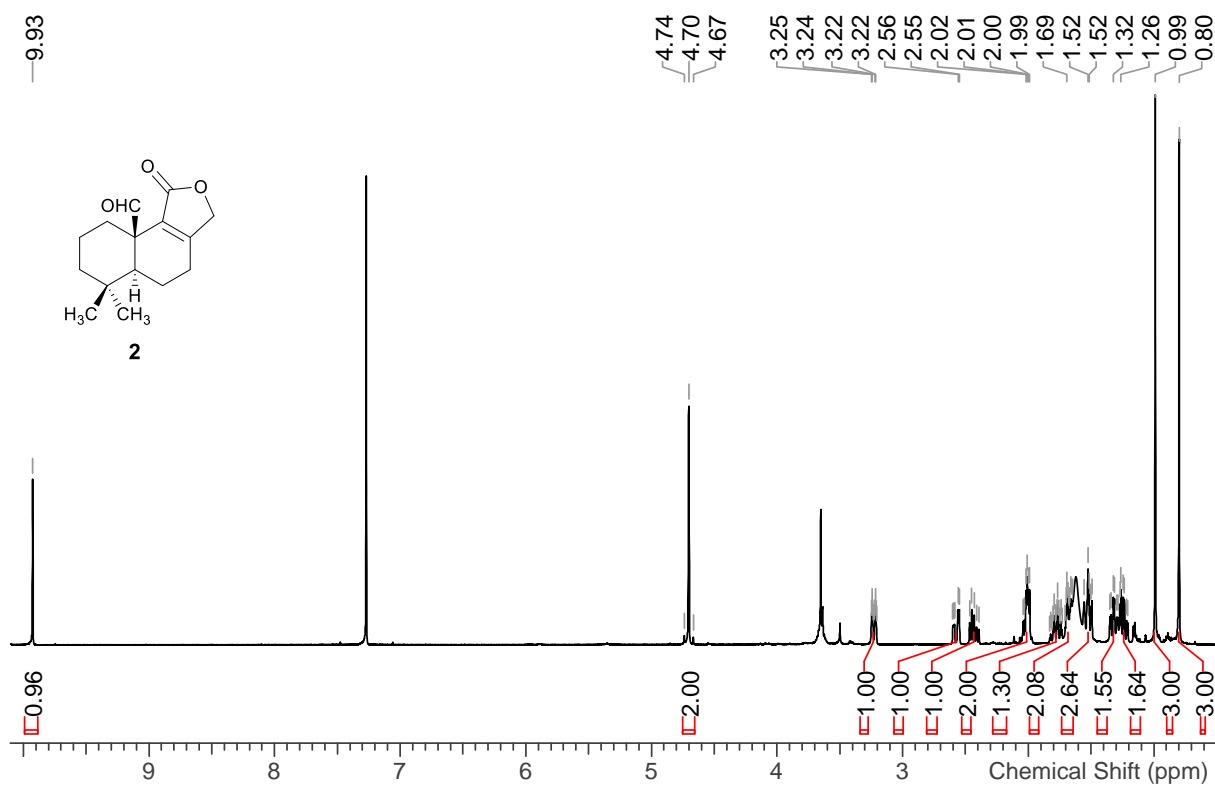

**Figure S13:** <sup>1</sup>H NMR spectrum (500 MHz, CDCl<sub>3</sub>, 298 K) of the purified compound 2.

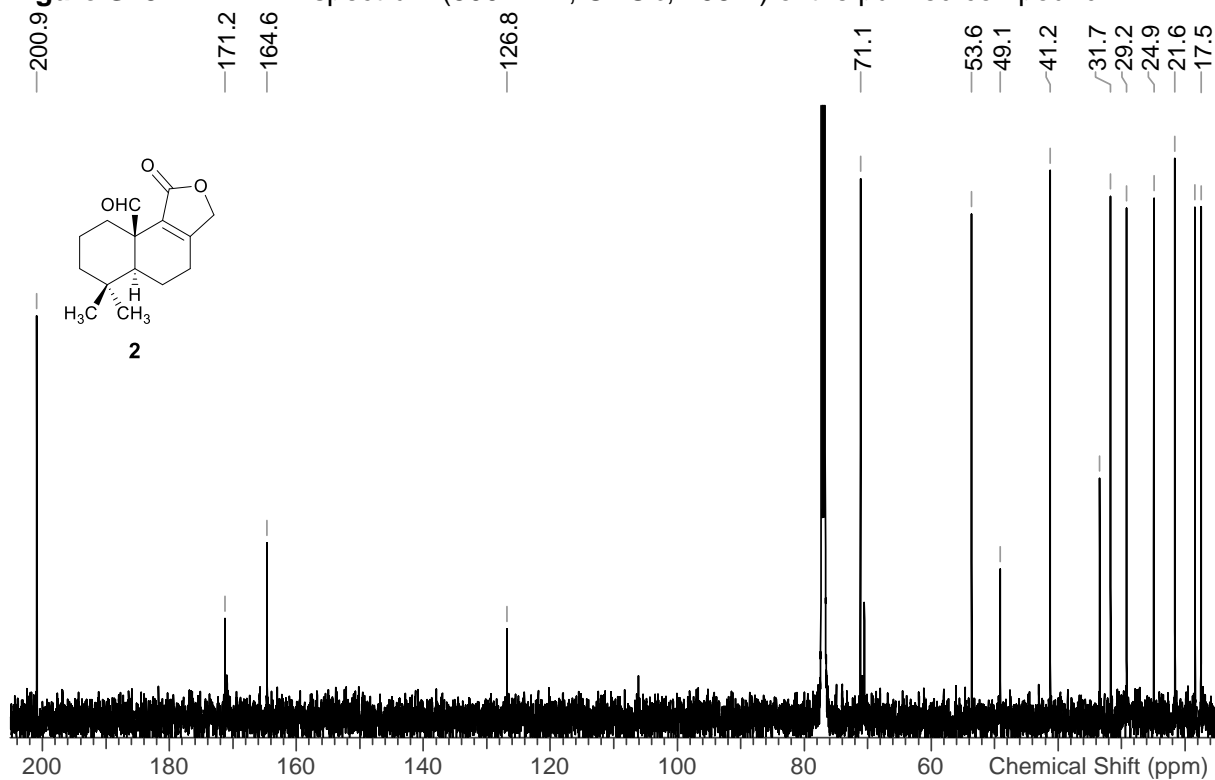

**Figure S14:** <sup>13</sup>C NMR spectrum (125 MHz, CDCl<sub>3</sub>, 298 K) of the purified compound 2.

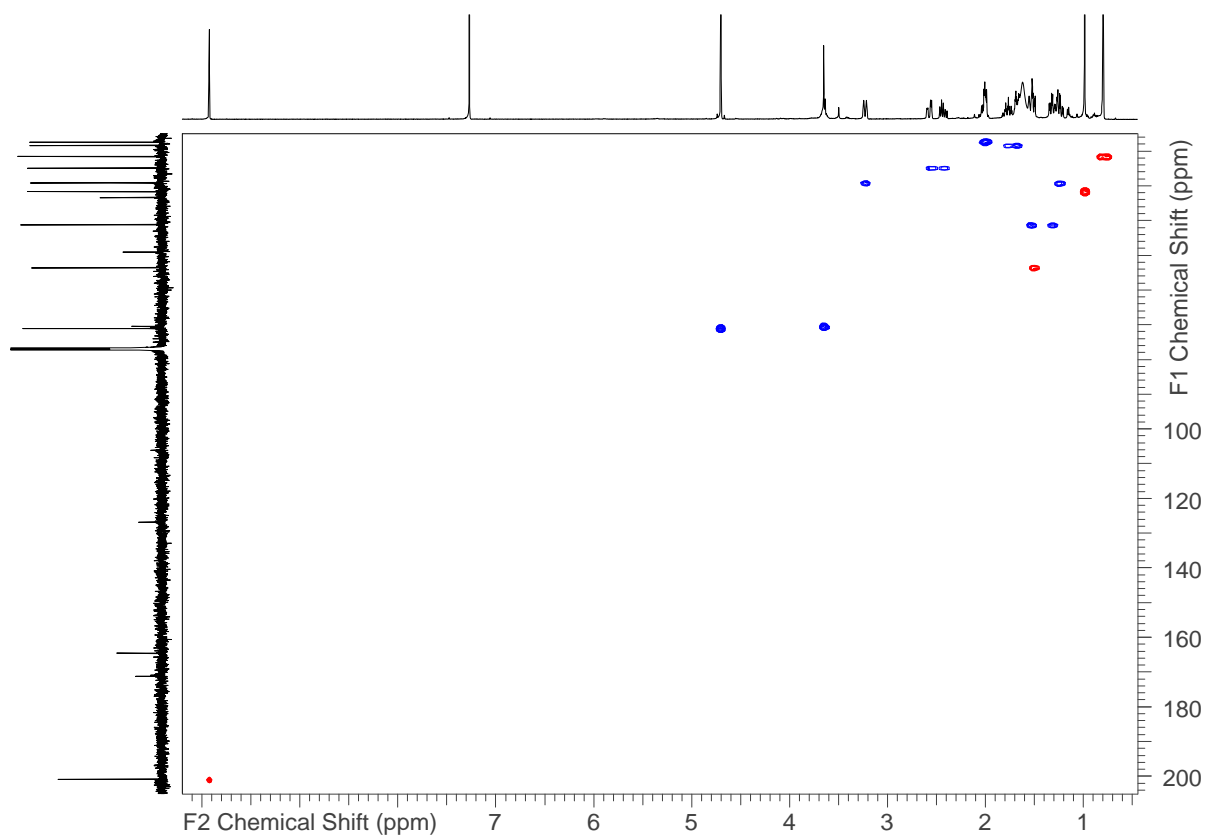

**Figure S15:**  $^1\text{H}$ ,  $^{13}\text{C}$  DEPT-HSQC spectrum (500 MHz,  $\text{CDCl}_3$ , 298 K) of the purified compound **2**.

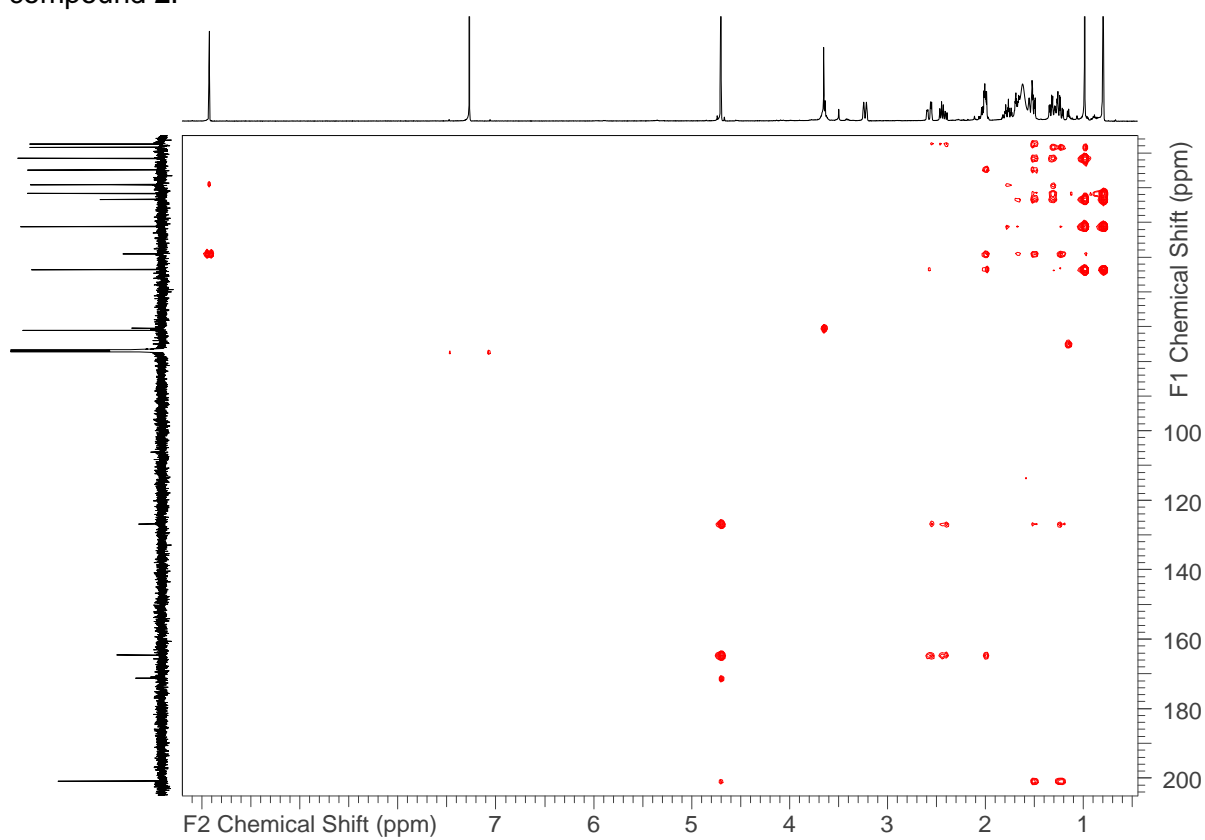

**Figure S16:**  $^1\text{H}$ ,  $^{13}\text{C}$  HMBC spectrum (500 MHz,  $\text{CDCl}_3$ , 298 K) of the purified compound **2**.

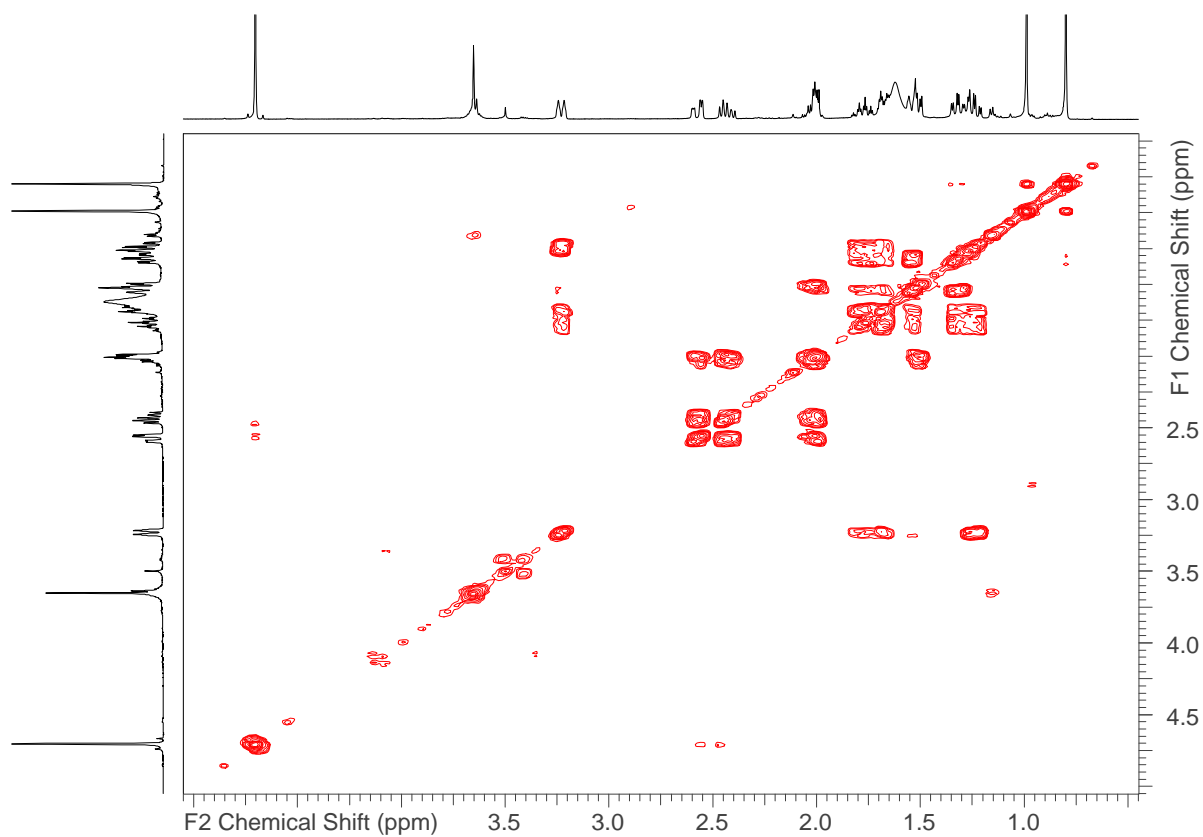

**Figure S17:**  $^1\text{H}$ ,  $^1\text{H}$  COSY spectrum (500 MHz,  $\text{CDCl}_3$ , 298 K) of the purified compound **2**.

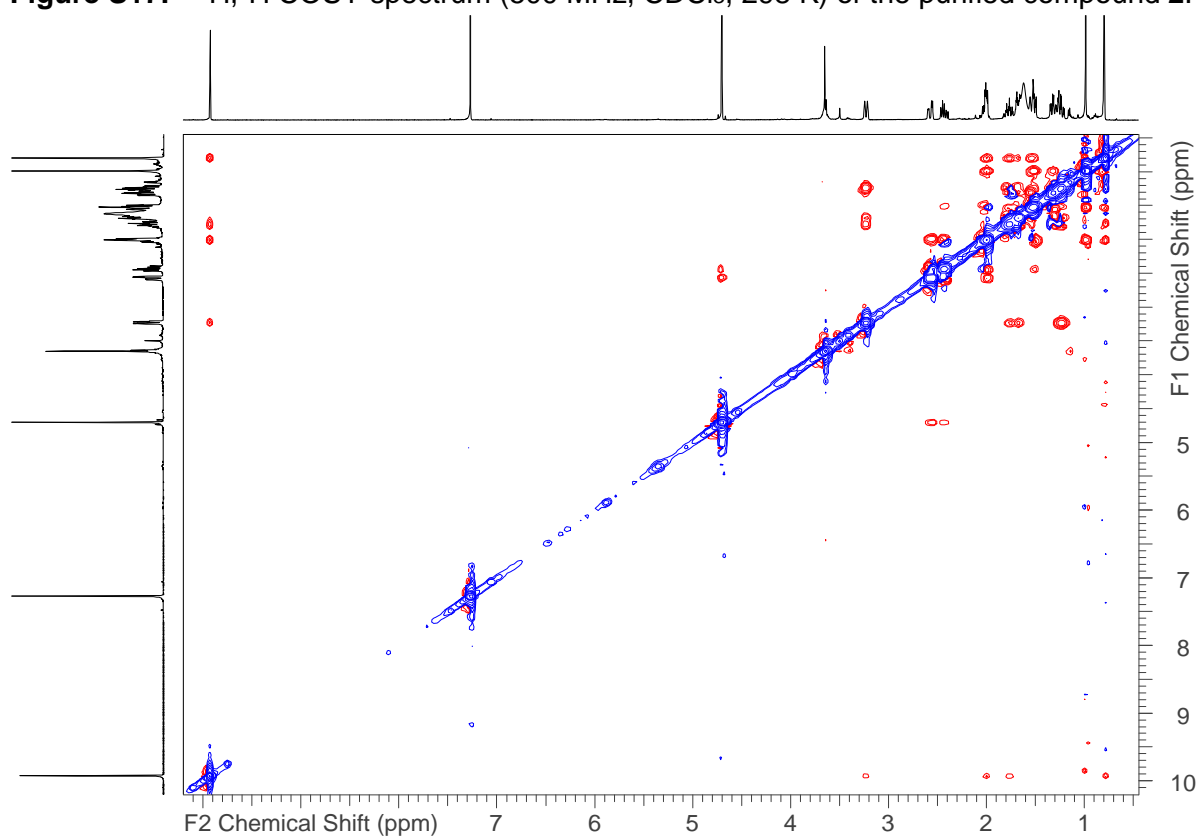

**Figure S18:**  $^1\text{H}$ ,  $^1\text{H}$  ROESY spectrum (500 MHz,  $\text{CDCl}_3$ , 298 K) of the purified compound **2**.

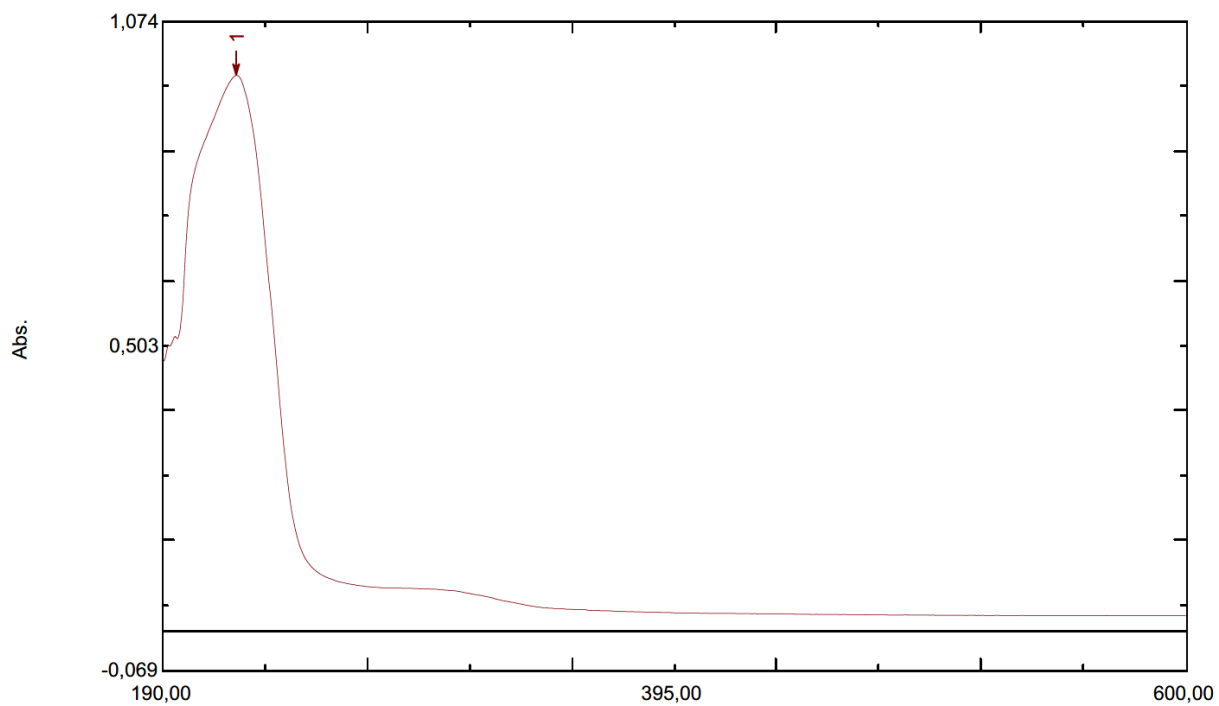

**Figure S19:** UV/Vis spectrum of compound **2** in MeOH.

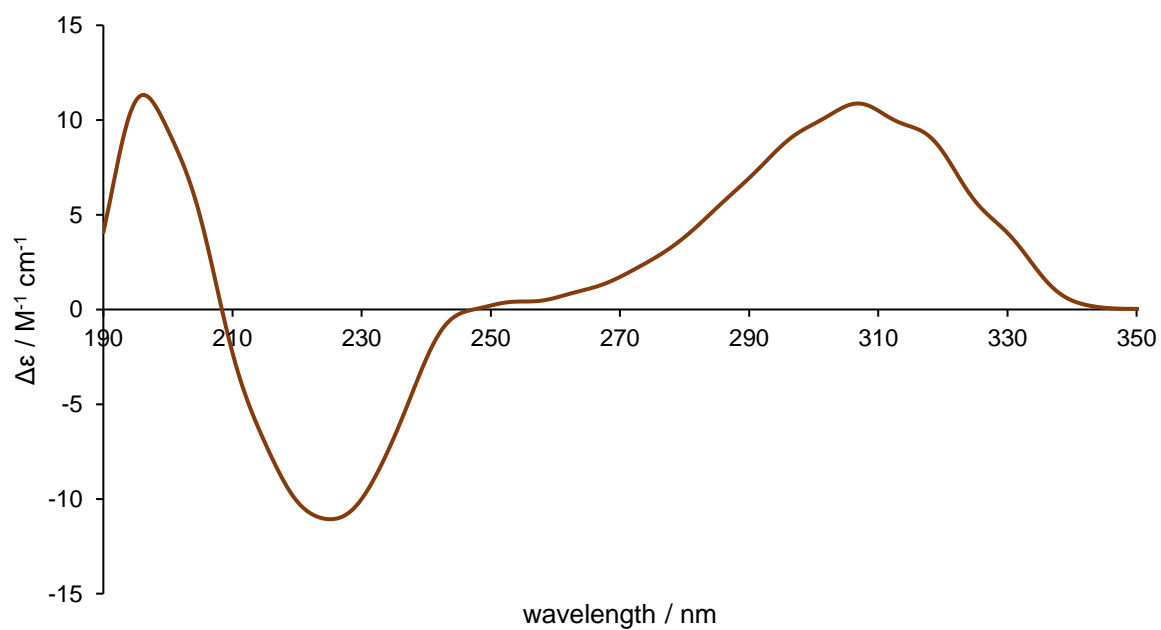

**Figure S20:** ECD spectrum of compound **2** in MeOH

**(7) Analytical data of compound 3**

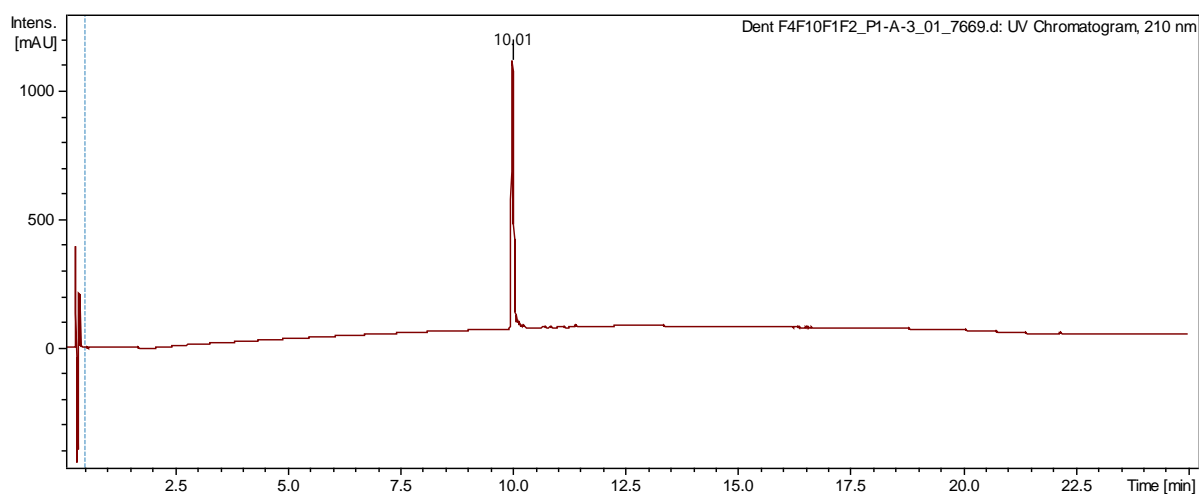

**Figure S21:** HPLC-DAD chromatogram of compound **3**.

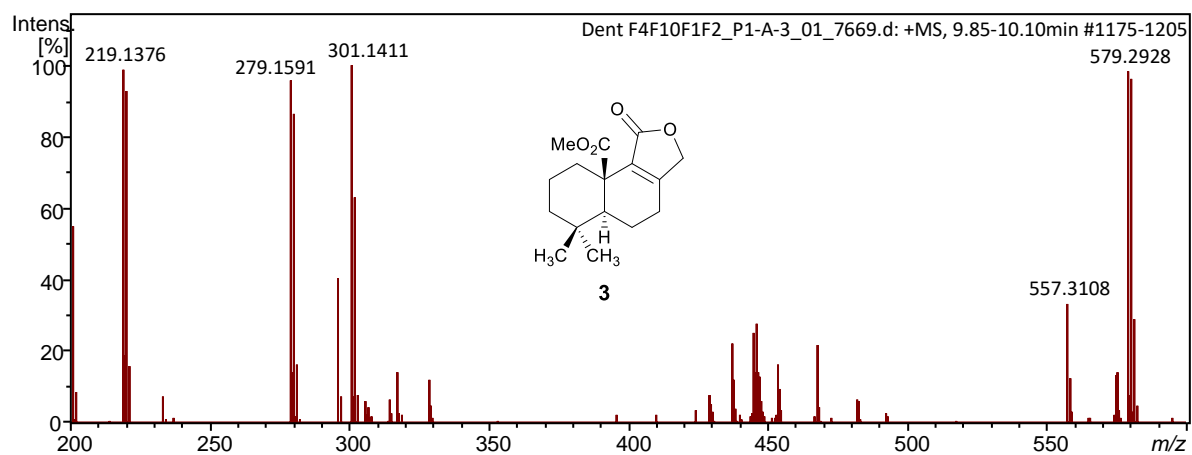

**Figure S22:** HR-(+)ESIMS spectrum of compound **3**.



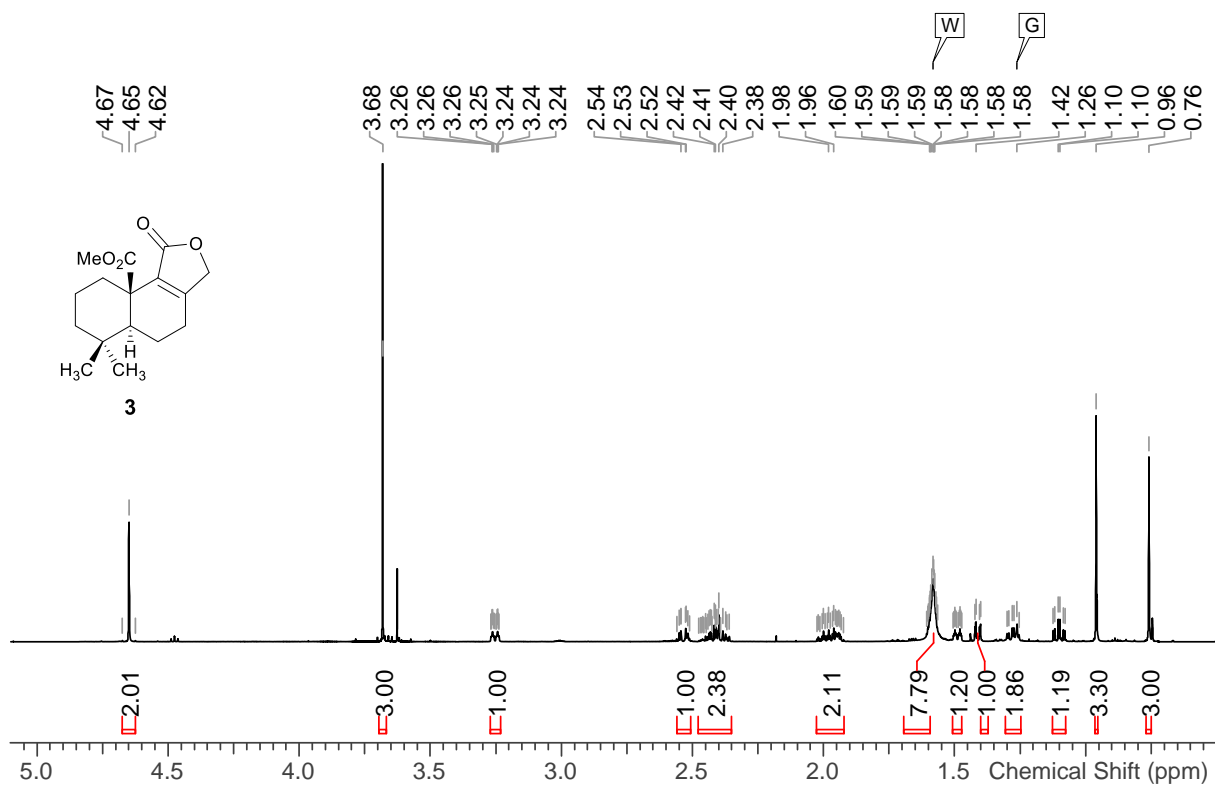

**Figure S23:** <sup>1</sup>H NMR spectrum (700 MHz, CDCl<sub>3</sub>, 298 K) of the purified compound **3**. EA: ethyl acetate.

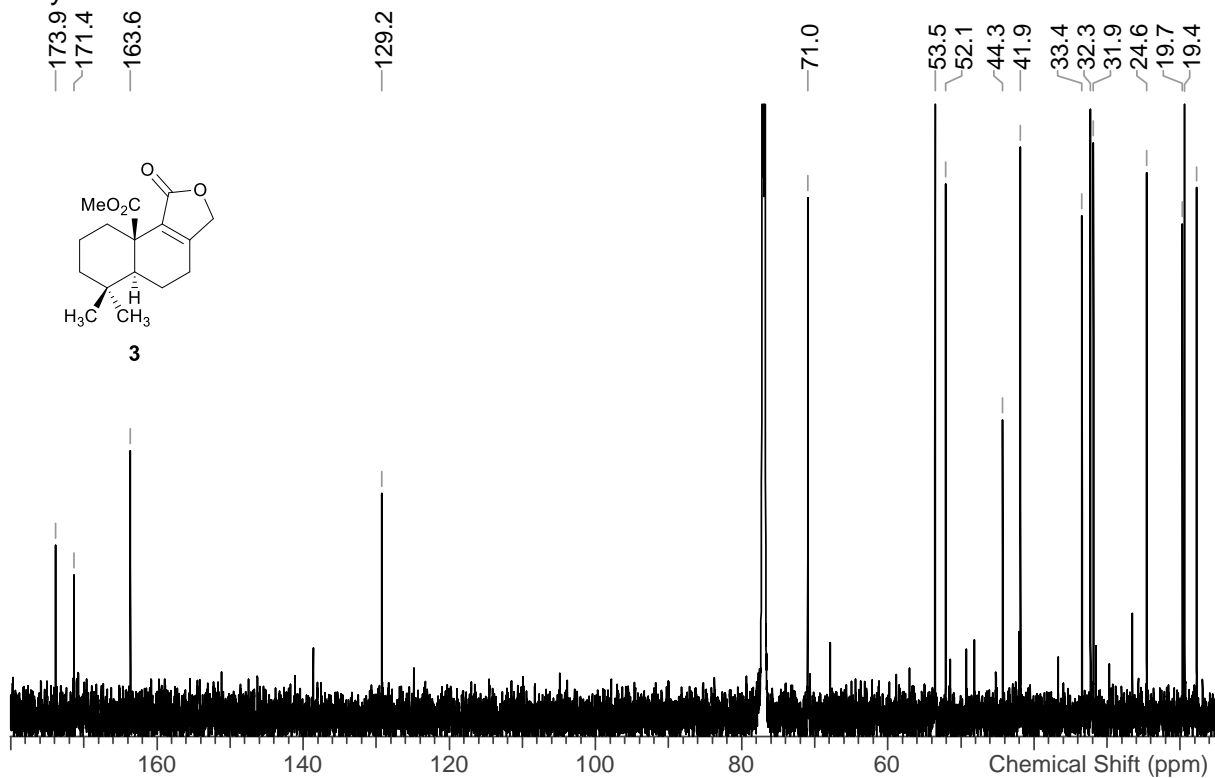

**Figure S24:** <sup>13</sup>C NMR spectrum (175 MHz, CDCl<sub>3</sub>, 298 K) of the purified compound **3**.

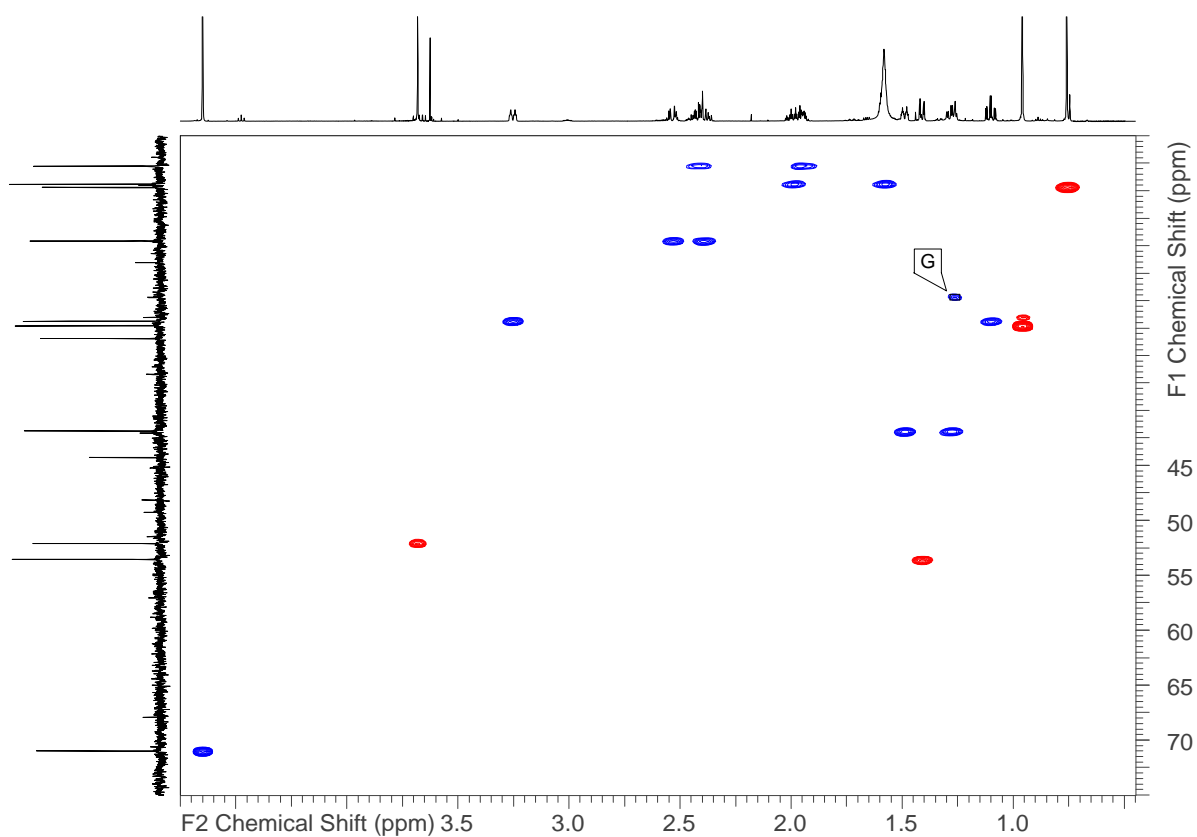

**Figure S25:**  $^1\text{H},^{13}\text{C}$  DEPT-HSQC spectrum (700 MHz,  $\text{CDCl}_3$ , 298 K) of the purified compound **3**. G: grease.

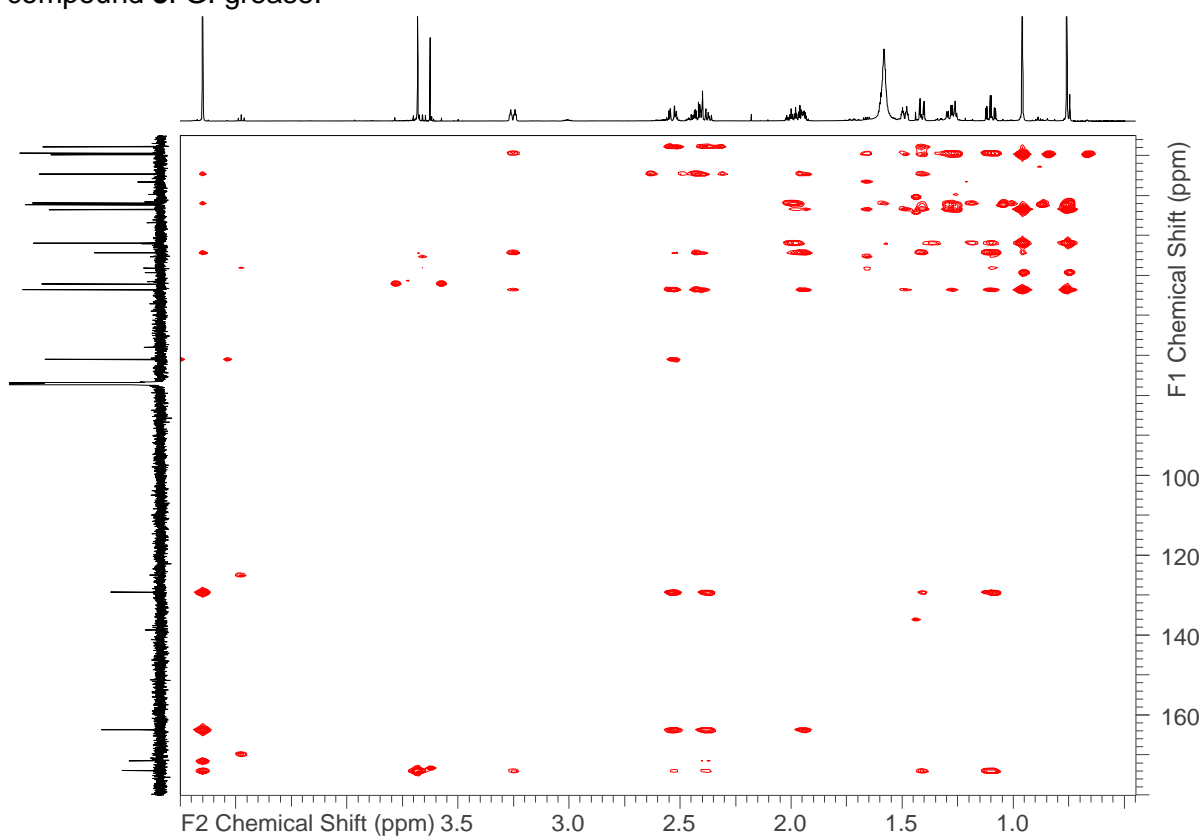

**Figure S26:**  $^1\text{H},^{13}\text{C}$  HMBC spectrum (700 MHz,  $\text{CDCl}_3$ , 298 K) of the purified compound **3**.

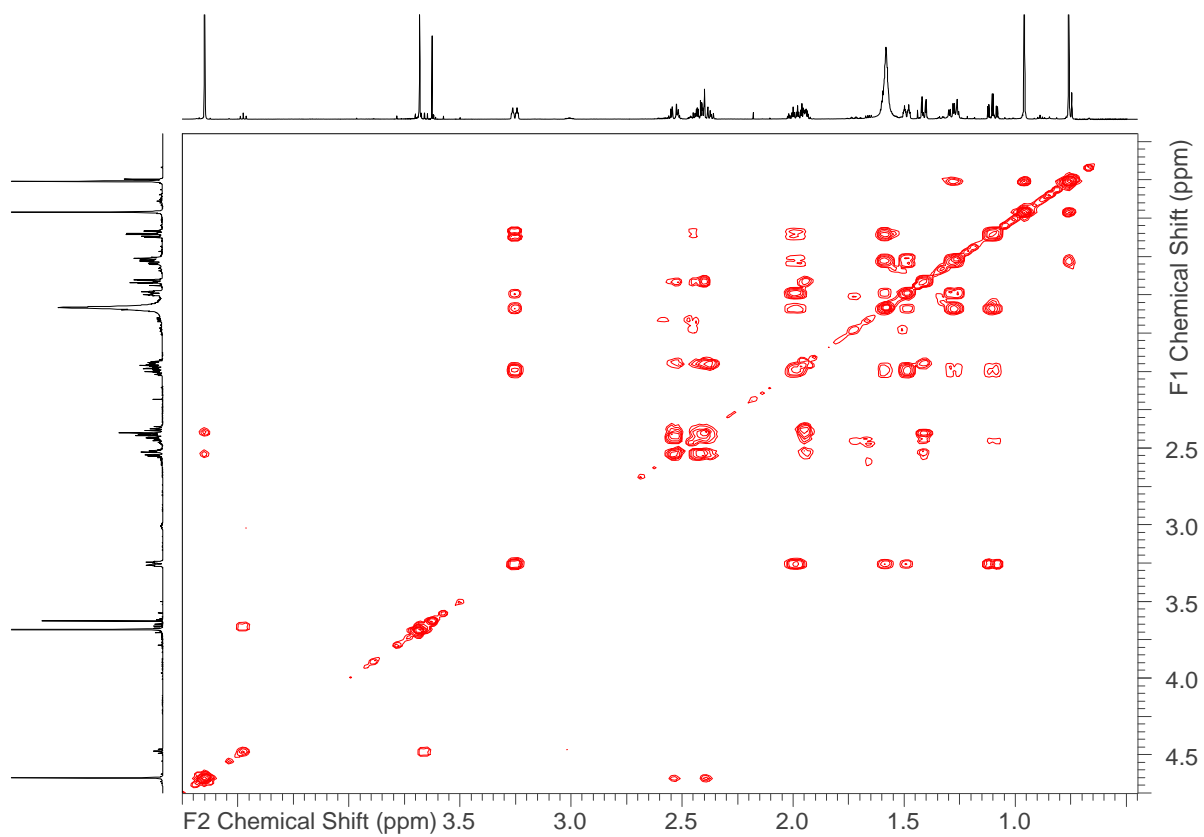

**Figure S27:**  $^1\text{H}$ ,  $^1\text{H}$  COSY spectrum (700 MHz,  $\text{CDCl}_3$ , 298 K) of the purified compound **3**.

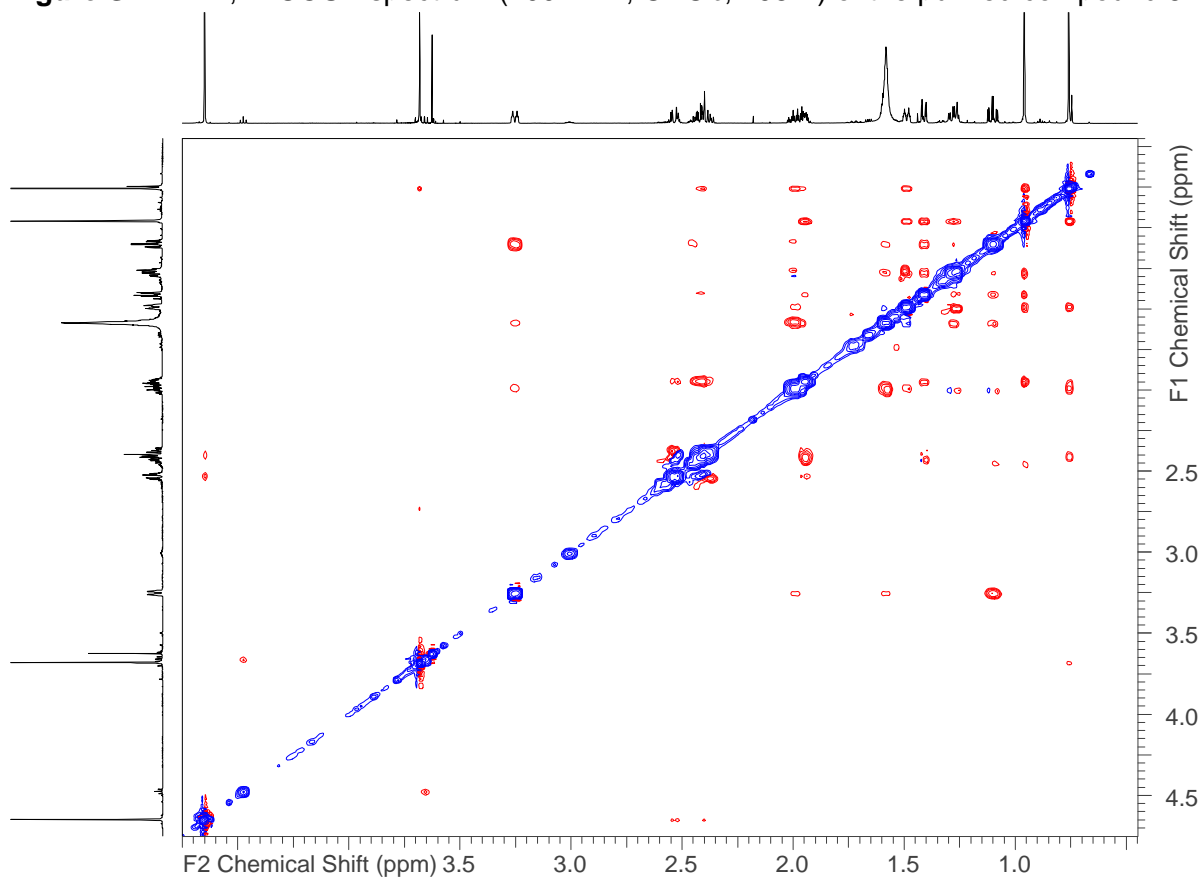

**Figure S28:**  $^1\text{H}$ ,  $^1\text{H}$  ROESY spectrum (700 MHz,  $\text{CDCl}_3$ , 298 K) of the purified compound **3**.

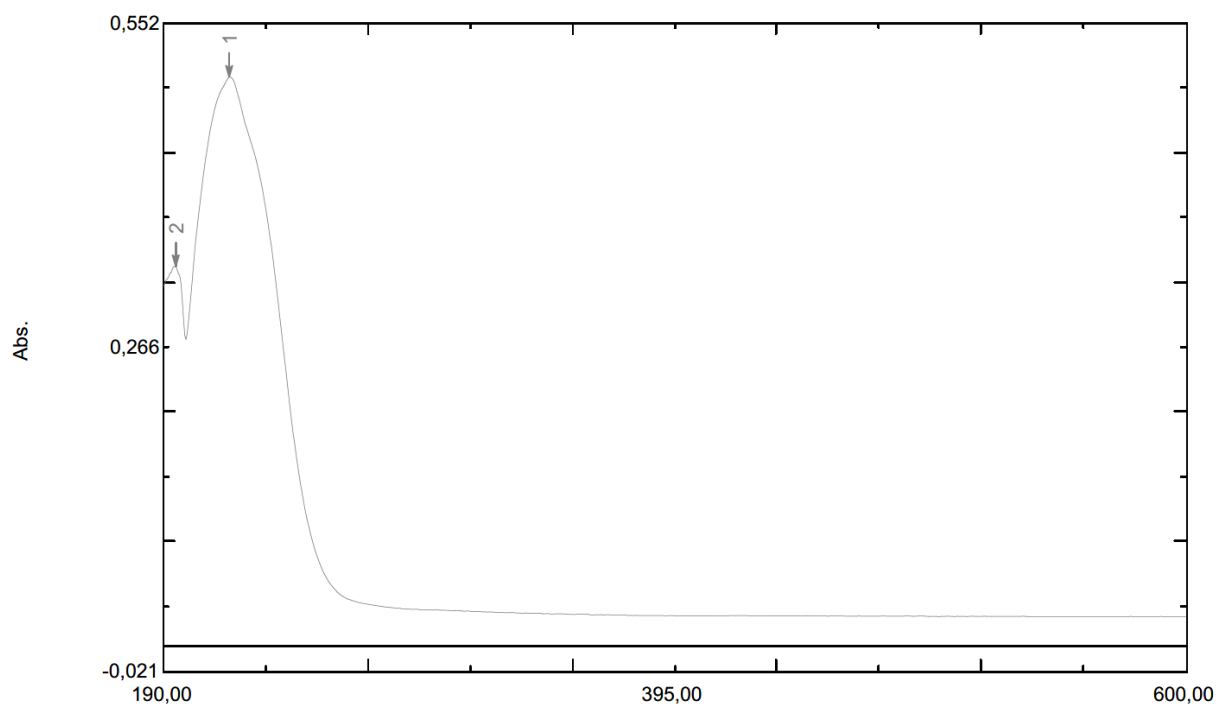

**Figure S29:** UV/Vis spectrum of compound **3** in MeOH.

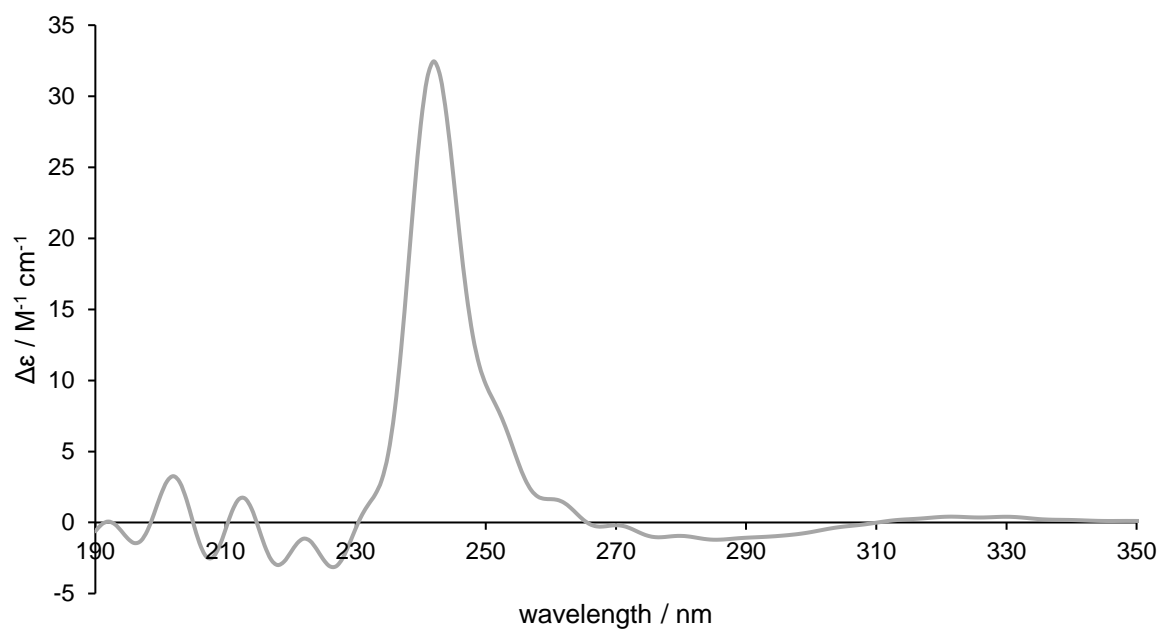

**Figure S30:** ECD spectrum of compound **3** in MeOH.

**(8) Analytical data of compound 4**

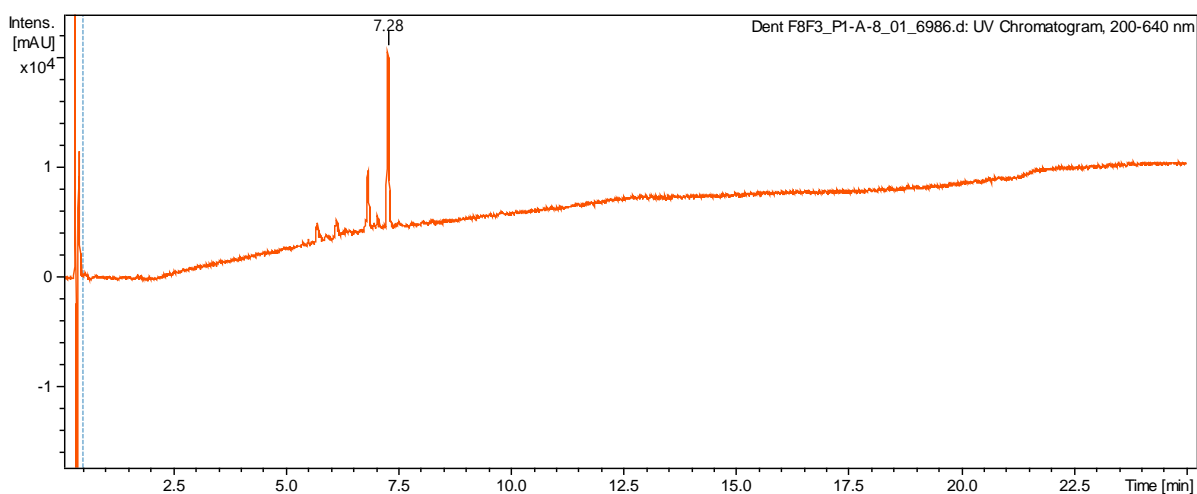

**Figure S31:** HPLC-DAD chromatogram of compound 4.

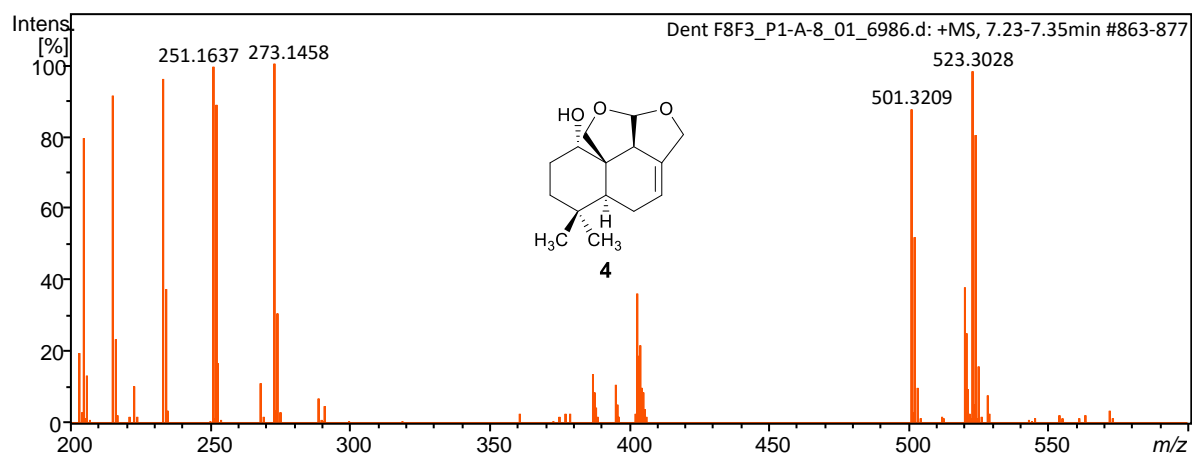

**Figure S32:** HR-(+)ESIMS spectrum of compound 4.

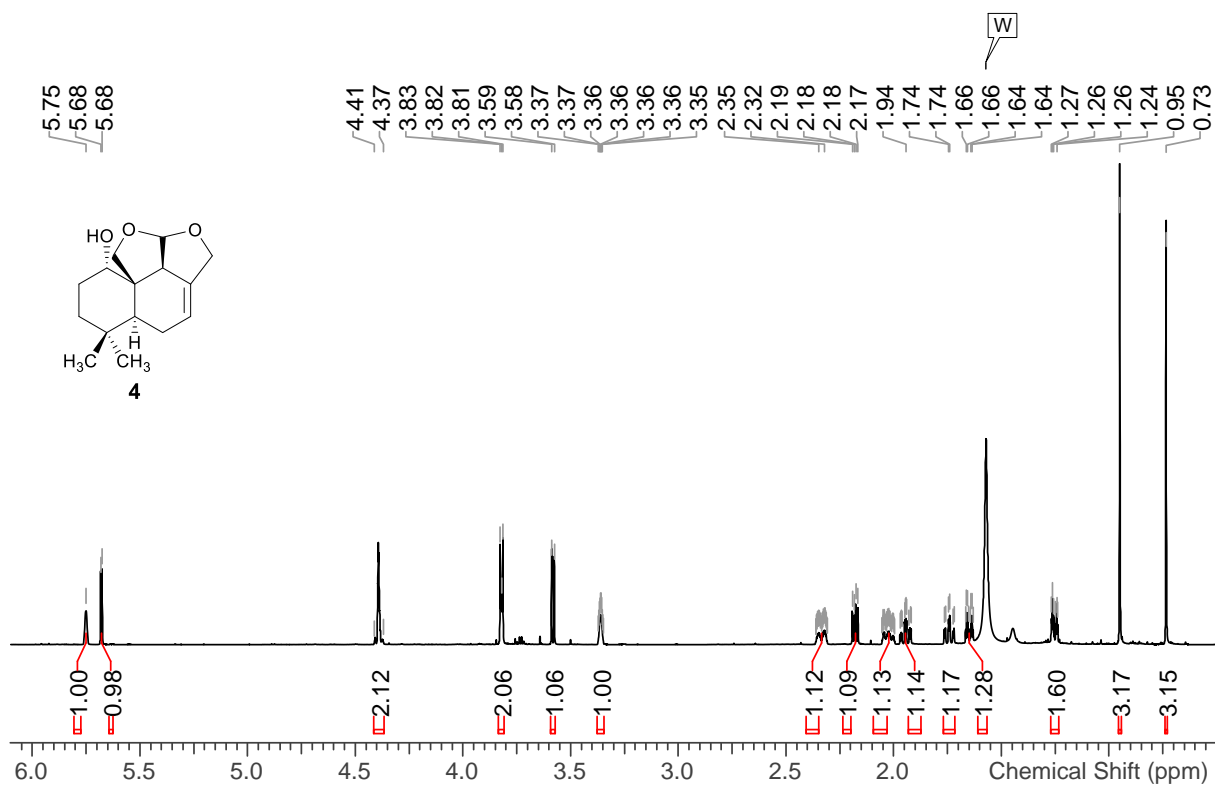

**Figure S33:** <sup>1</sup>H NMR spectrum (700 MHz, CDCl<sub>3</sub>, 298 K) of the purified compound 4. W: H<sub>2</sub>O, A: acetone, M: methanol.

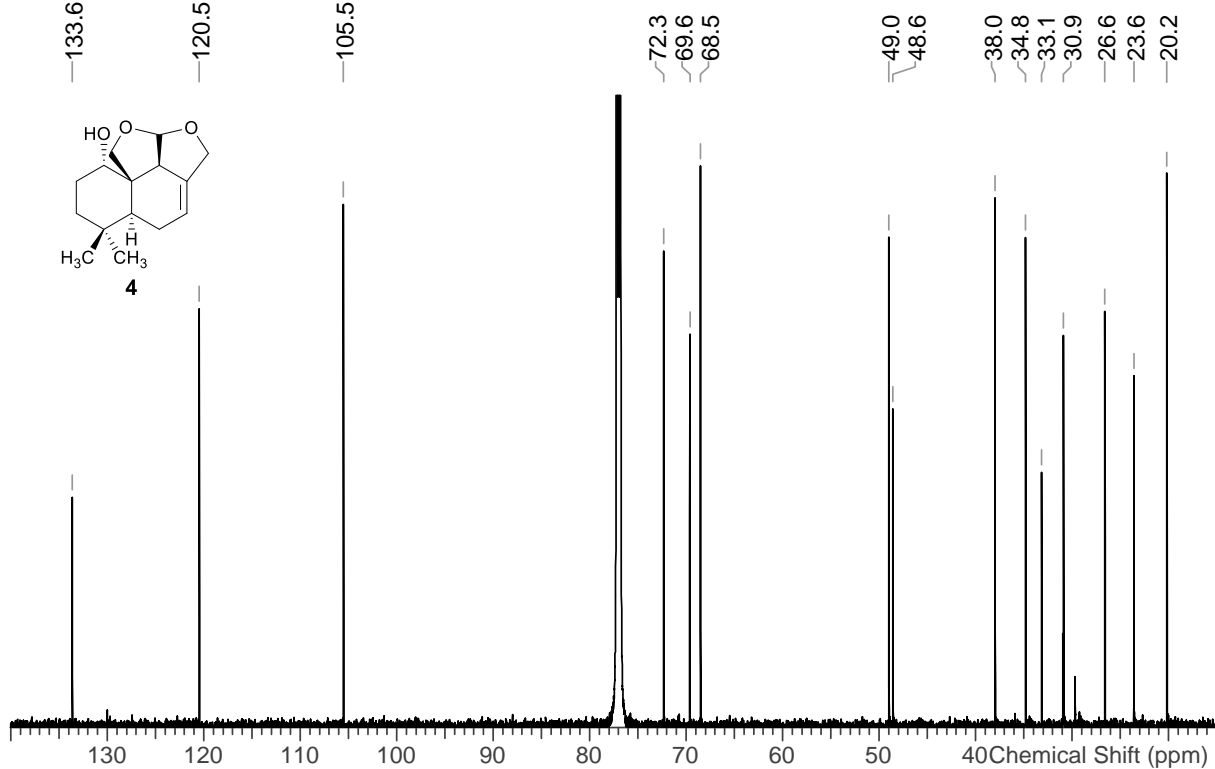

**Figure S34:** <sup>13</sup>C NMR spectrum (175 MHz, CDCl<sub>3</sub>, 298 K) of the purified compound 4.

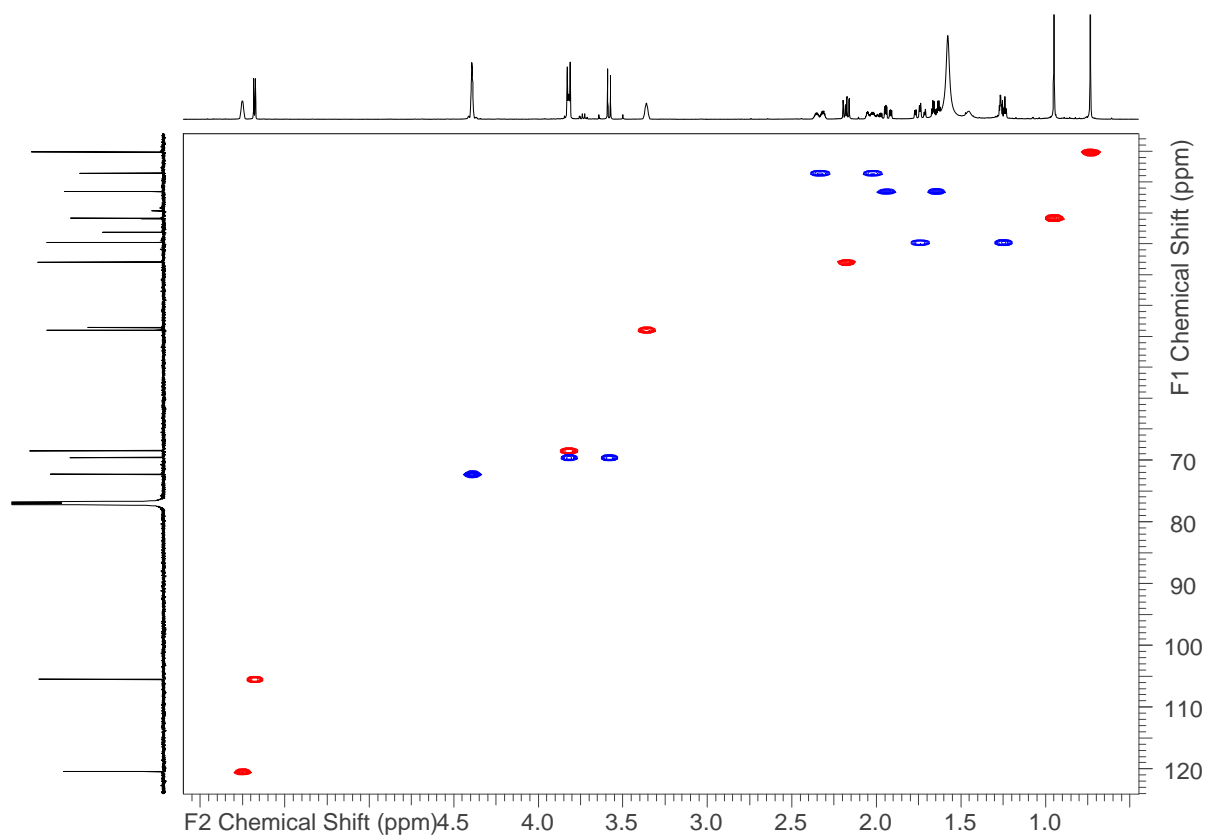

**Figure S35:**  $^1\text{H},^{13}\text{C}$  DEPT-HSQC spectrum (700 MHz,  $\text{CDCl}_3$ , 298 K) of the purified compound **4**.

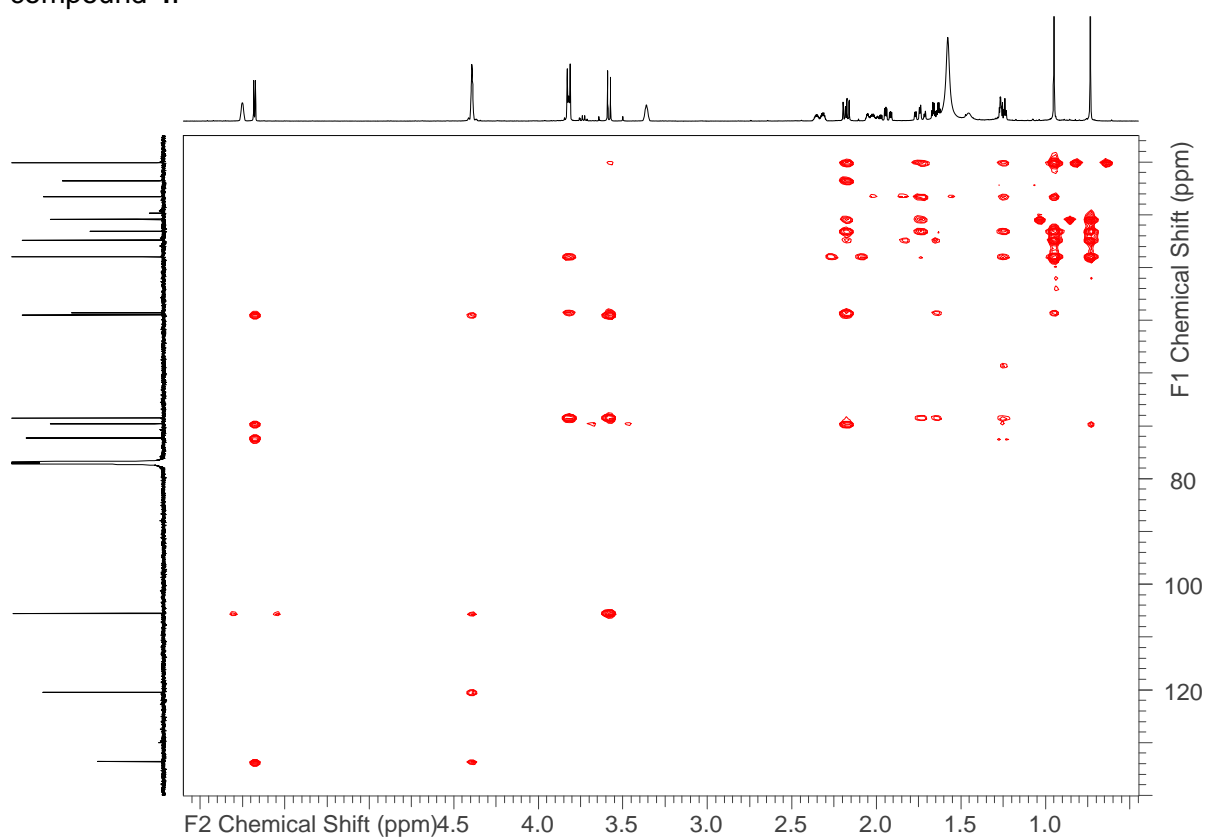

**Figure S36:**  $^1\text{H},^{13}\text{C}$  HMBC spectrum (700 MHz,  $\text{CDCl}_3$ , 298 K) of the purified compound **4**.

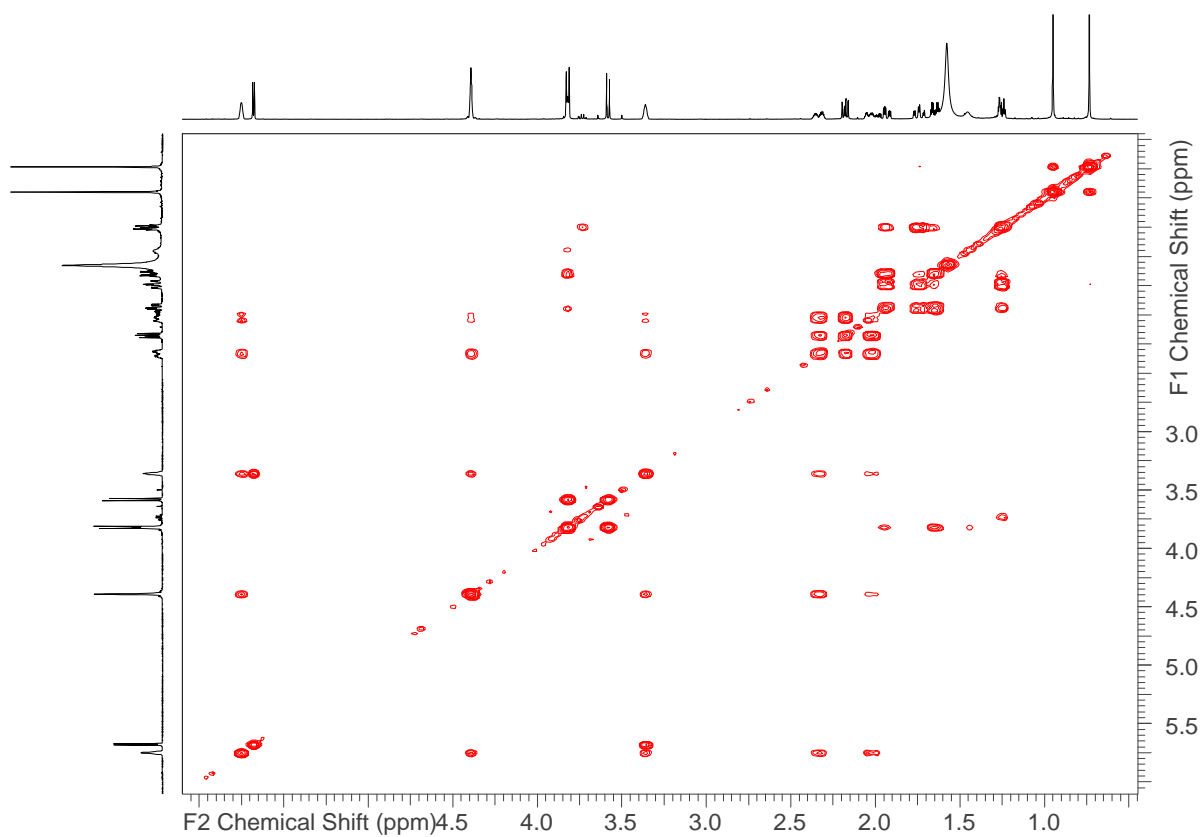

**Figure S37:** <sup>1</sup>H,<sup>1</sup>H COSY spectrum (700 MHz, CDCl<sub>3</sub>, 298 K) of the purified compound **4**.

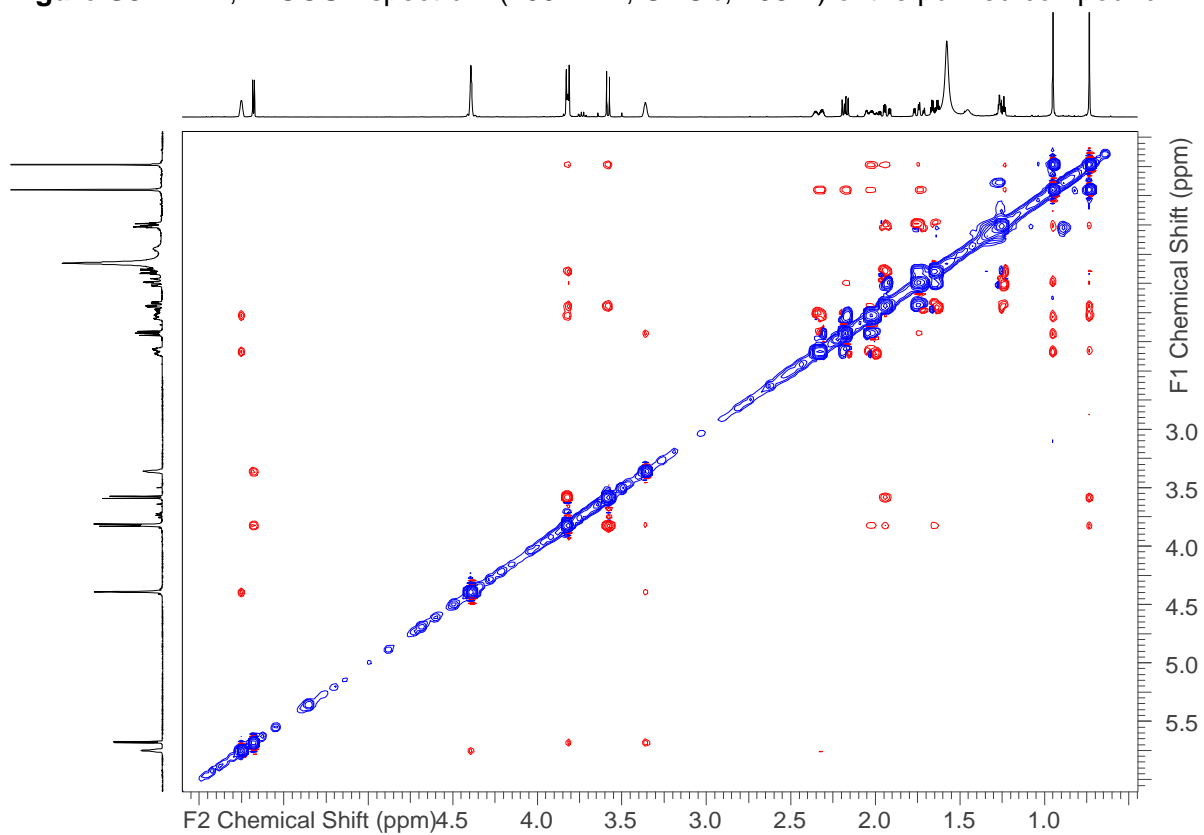

**Figure S38:** <sup>1</sup>H,<sup>1</sup>H ROESY spectrum (700 MHz, CDCl<sub>3</sub>, 298 K) of the purified compound **4**.



**Table S6:** NMR data of compound **4**, recorded at 700 MHz ( $^1\text{H}$ ) or 175 MHz ( $^{13}\text{C}$ ) in  $\text{CD}_3\text{OD}$  at 298 K.  $\delta_{\text{H}}$  and  $\delta_{\text{C}}$  are given in ppm.

|    | $\delta_{\text{C}}$ | $\delta_{\text{H}}$ (mult., $J$ in Hz)                                                             |
|----|---------------------|----------------------------------------------------------------------------------------------------|
| 1  | 69.2, CH            | 3.67 (t, $J$ 2.9 Hz)                                                                               |
| 2  | 27.2, $\text{CH}_2$ | 1.64 (dq, 14.4, 3.3 Hz, 1H, $\alpha$ )<br>1.92 (dddd, 14.4, 14.1, 3.8, 2.6 Hz, 1H, $\beta$ )       |
| 3  | 36.2, $\text{CH}_2$ | 1.19 (dddd, 13.3, 3.8, 2.9, 0.8 Hz, 1H, $\beta$ )<br>1.80 (ddd, 14.1, 13.3, 3.7 Hz, 1H, $\alpha$ ) |
| 4  | 34.2, Cq            |                                                                                                    |
| 5  | 39.4, CH            | 2.18 (dd, 11.2, 6.9 Hz, 1H, $\alpha$ )                                                             |
| 6  | 24.8, $\text{CH}_2$ | 2.06 (m, 1H, $\beta$ )<br>2.32 (m, 1H, $\alpha$ )                                                  |
| 7  | 122.0, CH           | 5.78 (m, 1H)                                                                                       |
| 8  | 134.9, Cq           |                                                                                                    |
| 9  | 50.4, CH            | 3.29 (m, 1H, $\alpha$ )                                                                            |
| 10 | 50.2, Cq            |                                                                                                    |
| 11 | 107.0, CH           | 5.58 (d, 4.3, 1H)                                                                                  |
| 12 | 73.2, $\text{CH}_2$ | 4.33 (m, 2H)                                                                                       |
| 13 | 20.7, $\text{CH}_3$ | 0.74 (s, 3H, $\beta$ )                                                                             |
| 14 | 31.6, $\text{CH}_3$ | 0.93 (s, 3H, $\alpha$ )                                                                            |
| 15 | 70.8, $\text{CH}_2$ | 3.58 (d, 8.4 Hz, 1H, $\alpha$ )<br>3.78 (d, 8.4 Hz, 1H, $\beta$ )                                  |

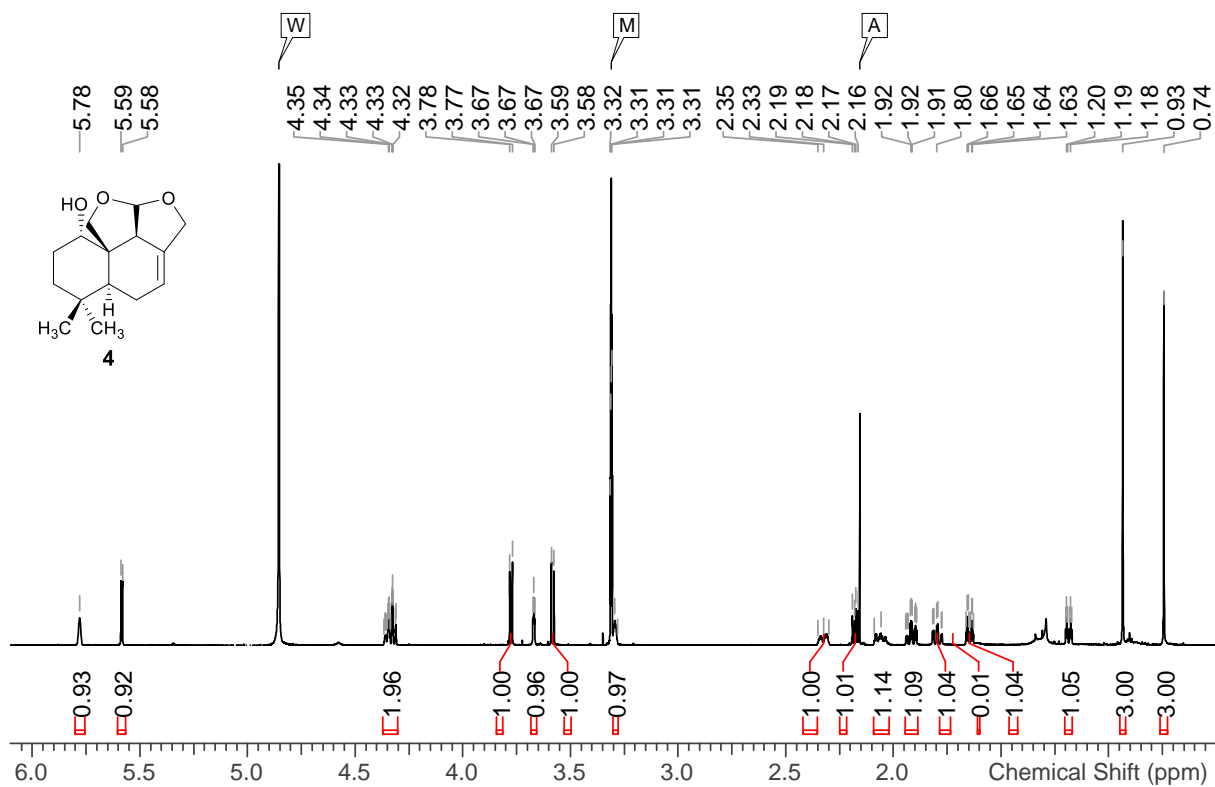

**Figure S39:**  $^1\text{H}$  NMR spectrum (700 MHz,  $\text{CD}_3\text{OD}$ , 298 K) of the purified compound **4**. W:  $\text{H}_2\text{O}$ , M: methanol, A: acetone.

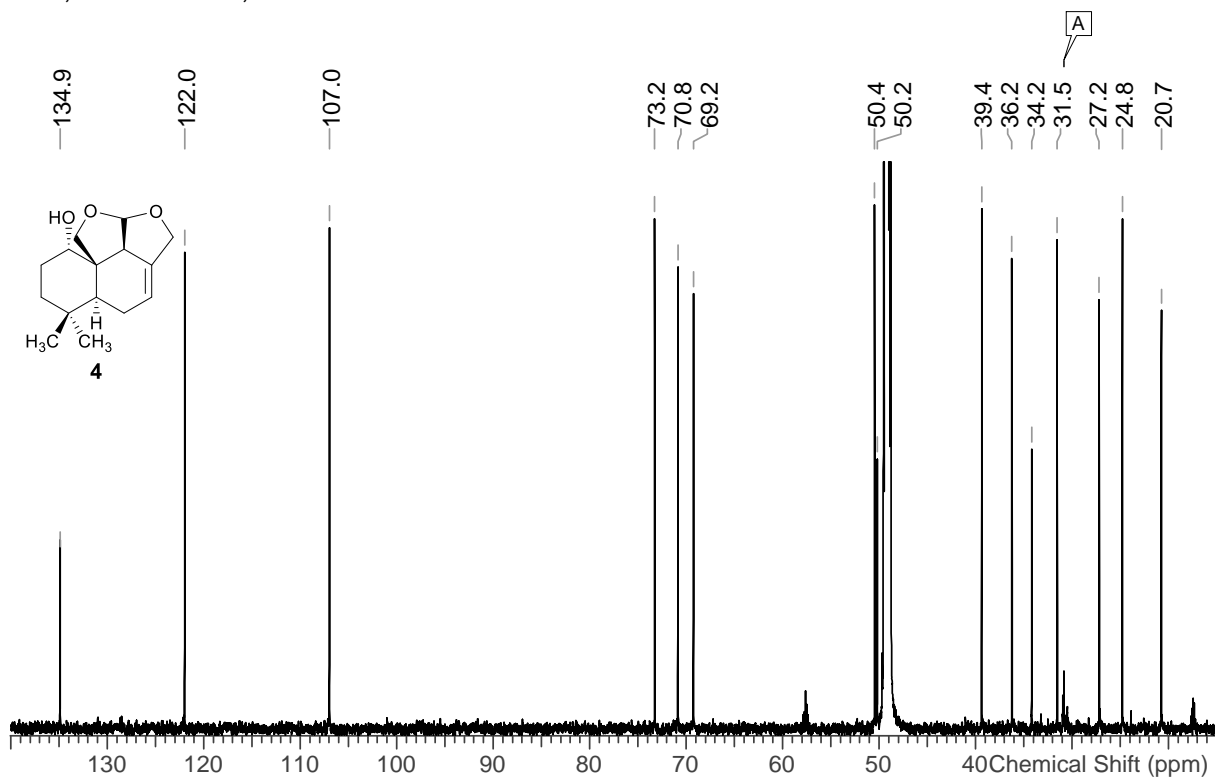

**Figure S40:**  $^{13}\text{C}$  NMR spectrum (175 MHz,  $\text{CD}_3\text{OD}$ , 298 K) of the purified compound **4**. A: acetone.

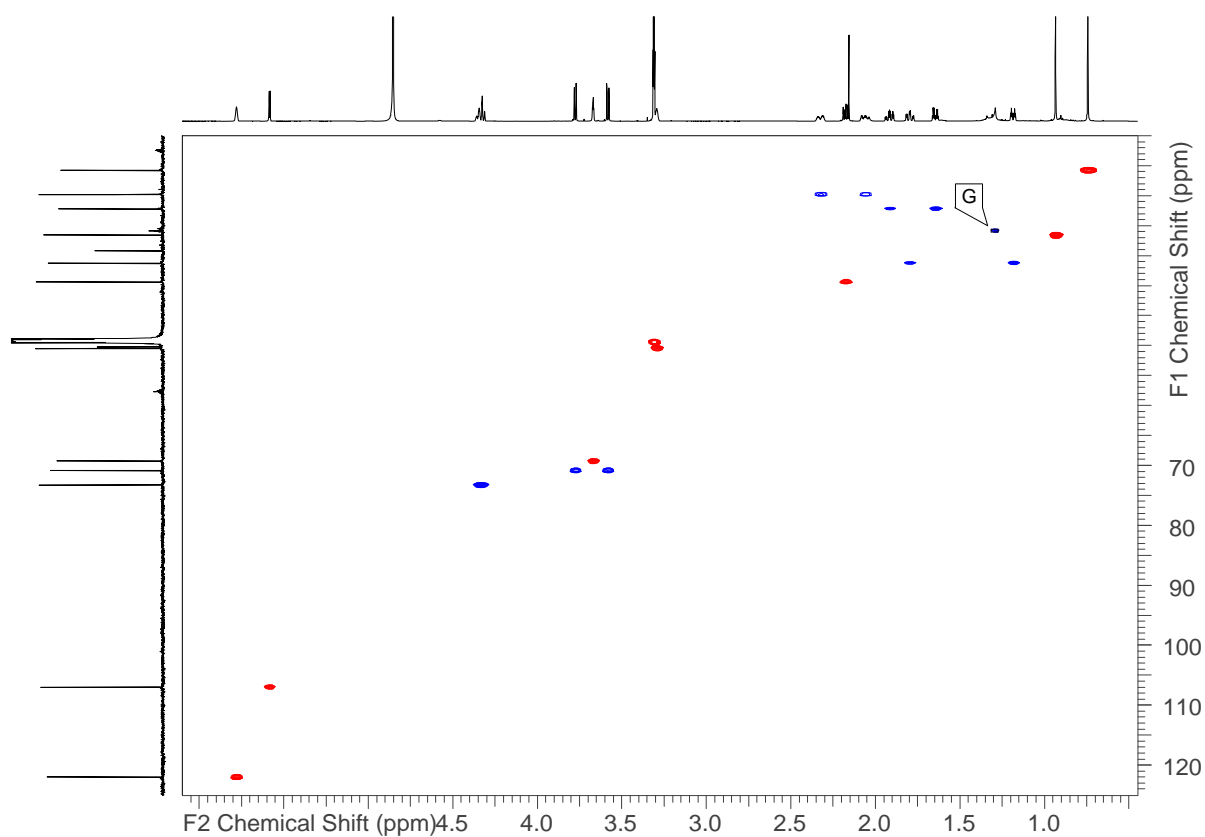

**Figure S41:**  $^1\text{H},^{13}\text{C}$  DEPT-HSQC spectrum (700 MHz,  $\text{CD}_3\text{OD}$ , 298 K) of the purified compound **4**.

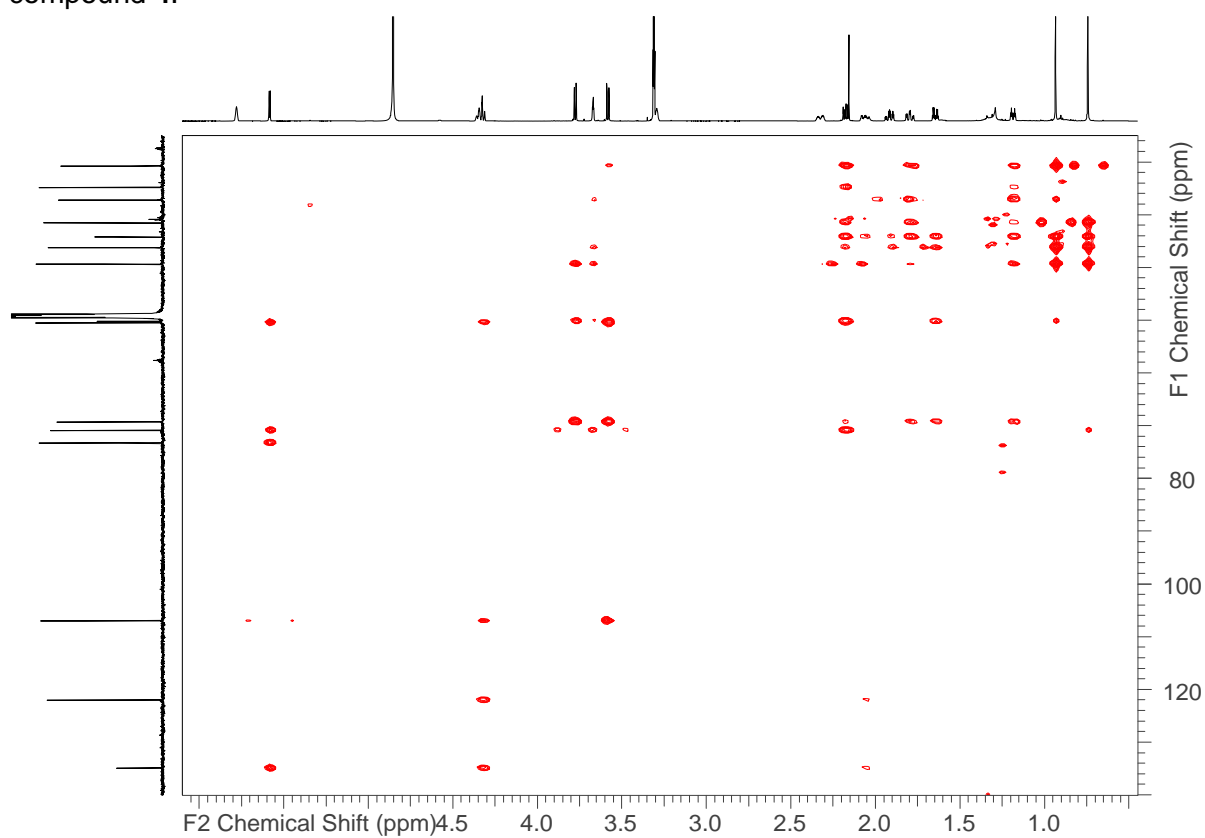

**Figure S42:**  $^1\text{H},^{13}\text{C}$  HMBC spectrum (700 MHz,  $\text{CD}_3\text{OD}$ , 298 K) of the purified compound **4**.

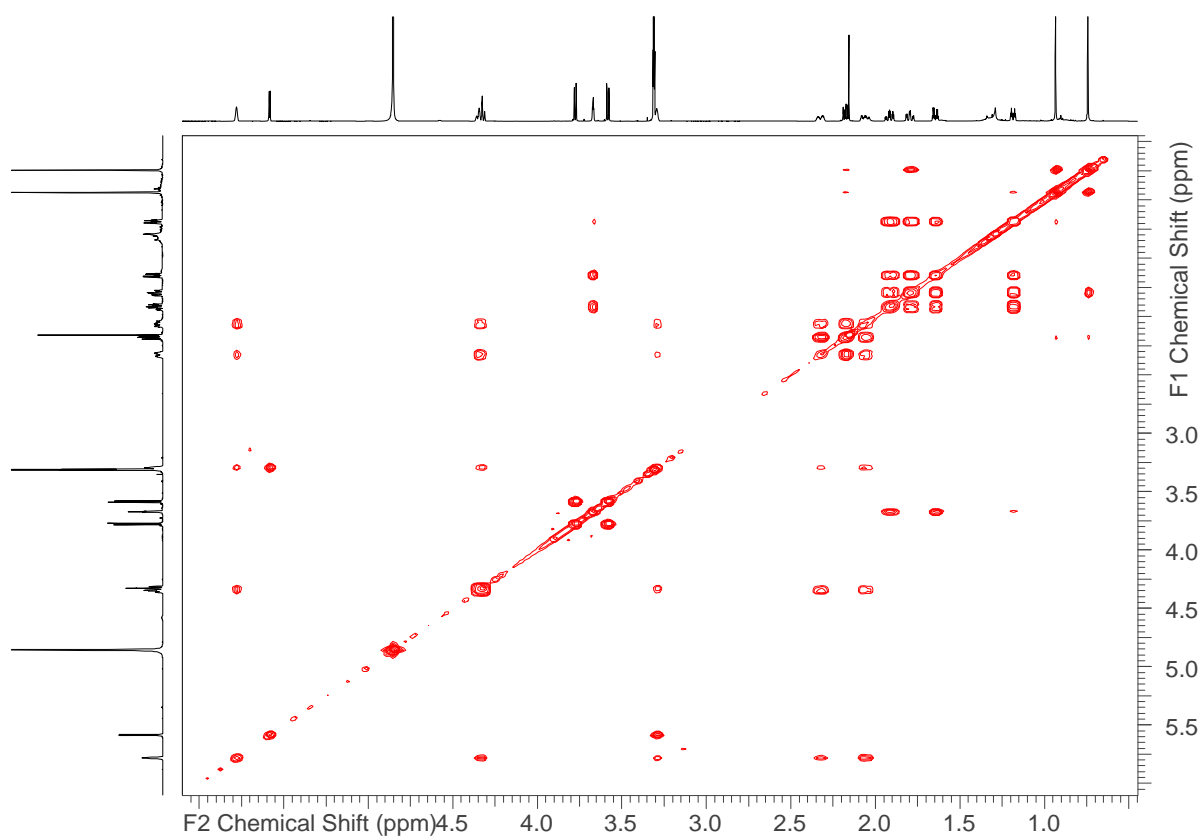

**Figure S43:**  $^1\text{H}$ ,  $^1\text{H}$  COSY spectrum (700 MHz,  $\text{CD}_3\text{OD}$ , 298 K) of the purified compound **4**.

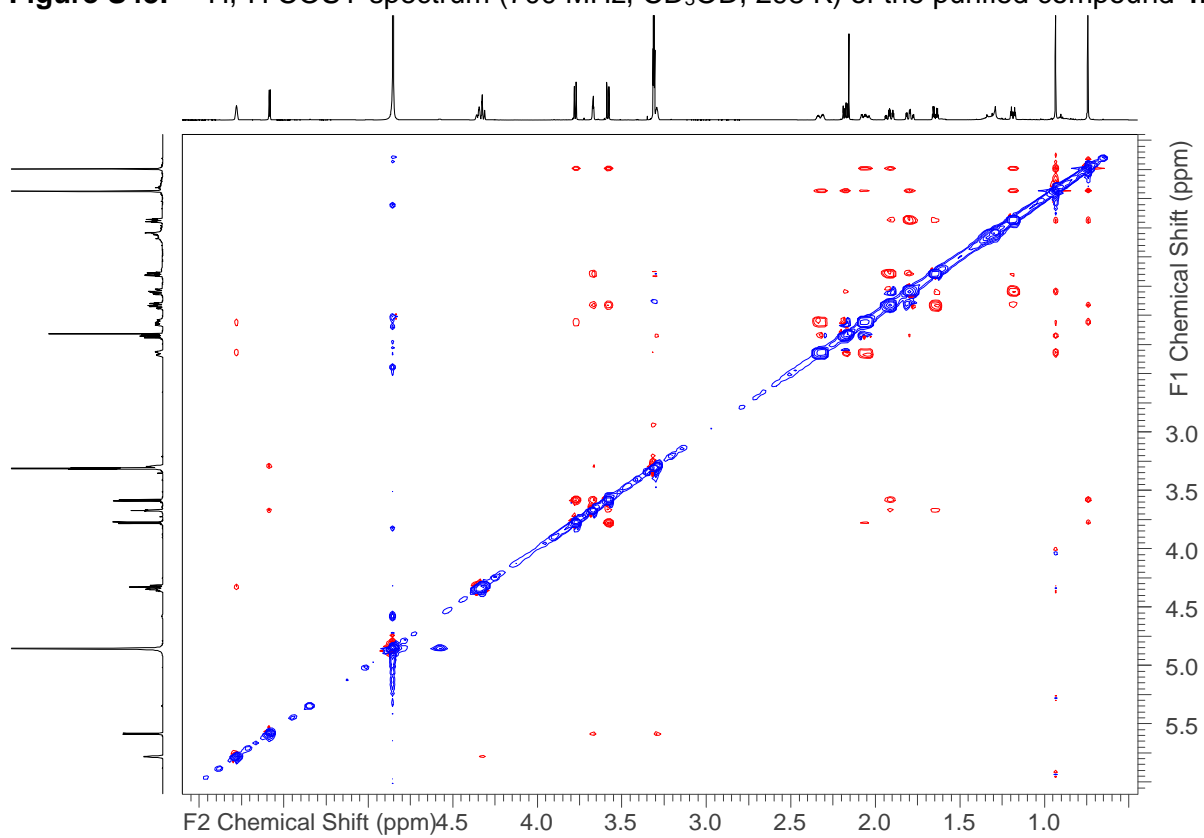

**Figure S44:**  $^1\text{H}$ ,  $^1\text{H}$  ROESY spectrum (700 MHz,  $\text{CD}_3\text{OD}$ , 298 K) of the purified compound **4**.

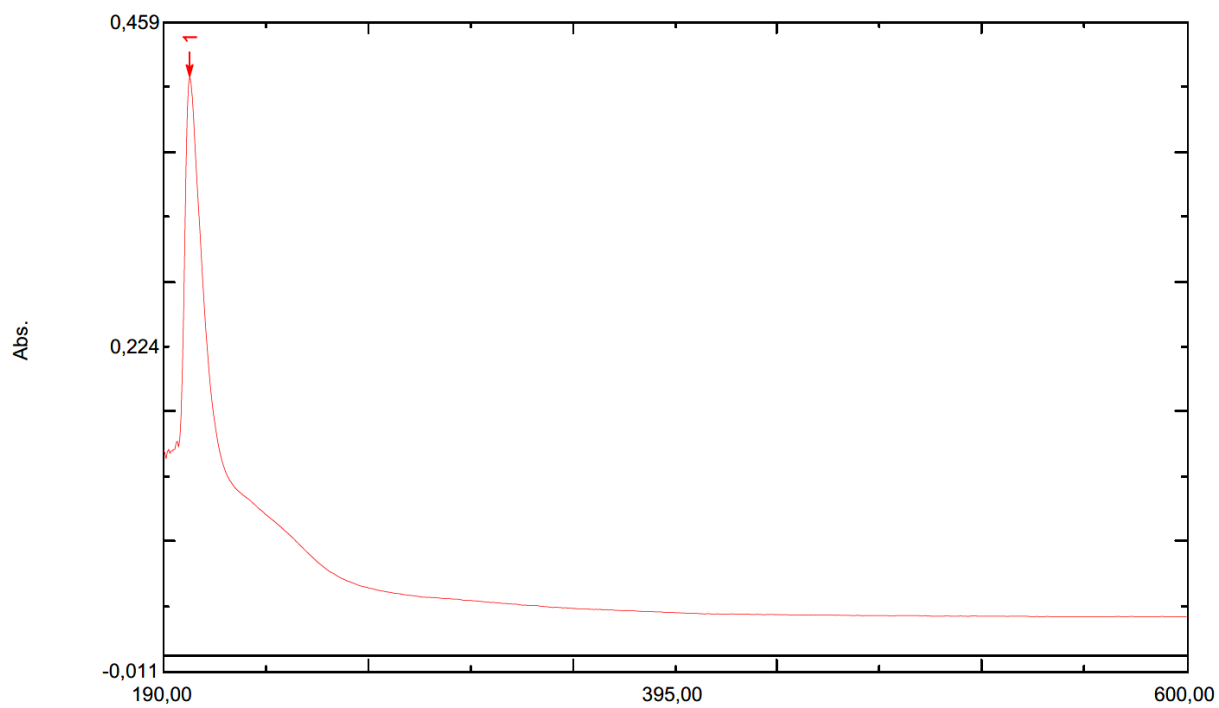

**Figure S45:** UV/Vis spectrum of compound **4** in MeOH.

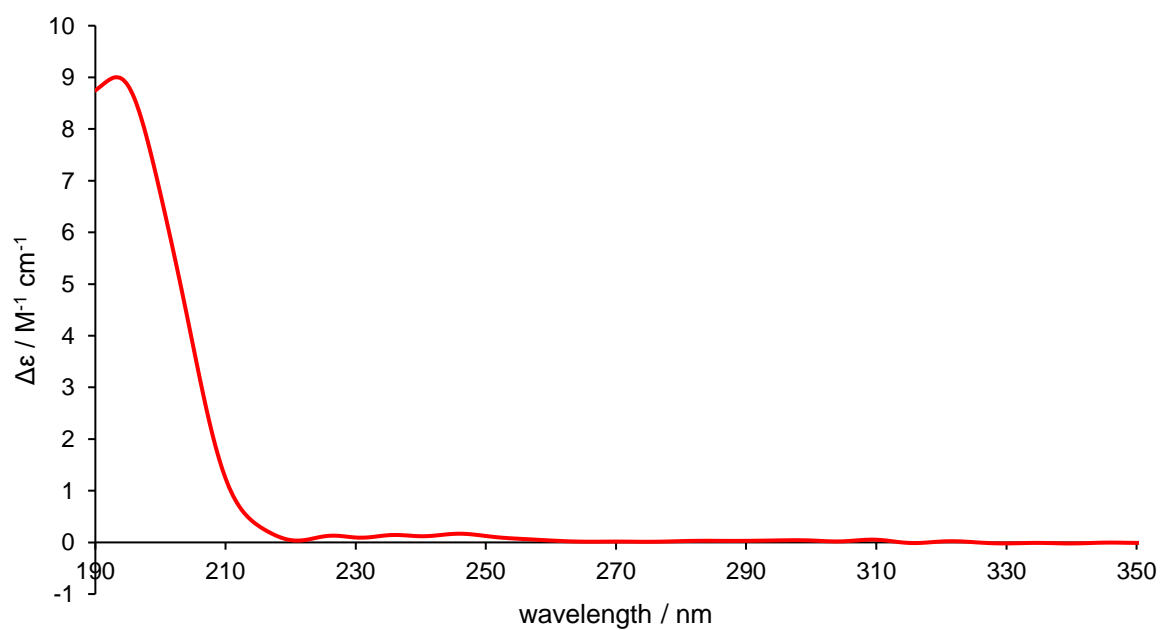

**Figure S46:** ECD spectrum of compound **4** in MeOH.

**(9) Analytical data of compound 5**

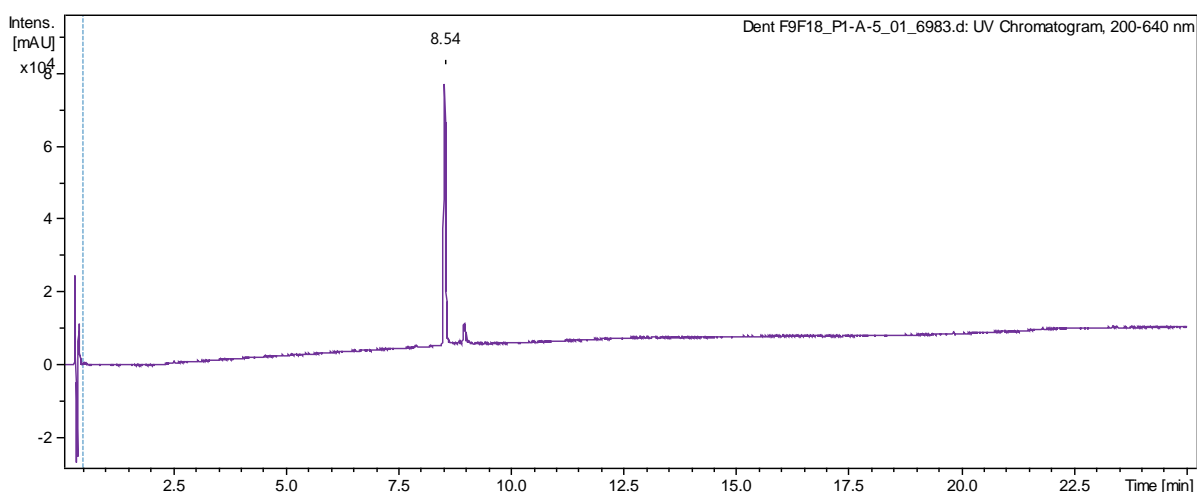

**Figure S47:** HPLC-DAD chromatogram of compound 5.

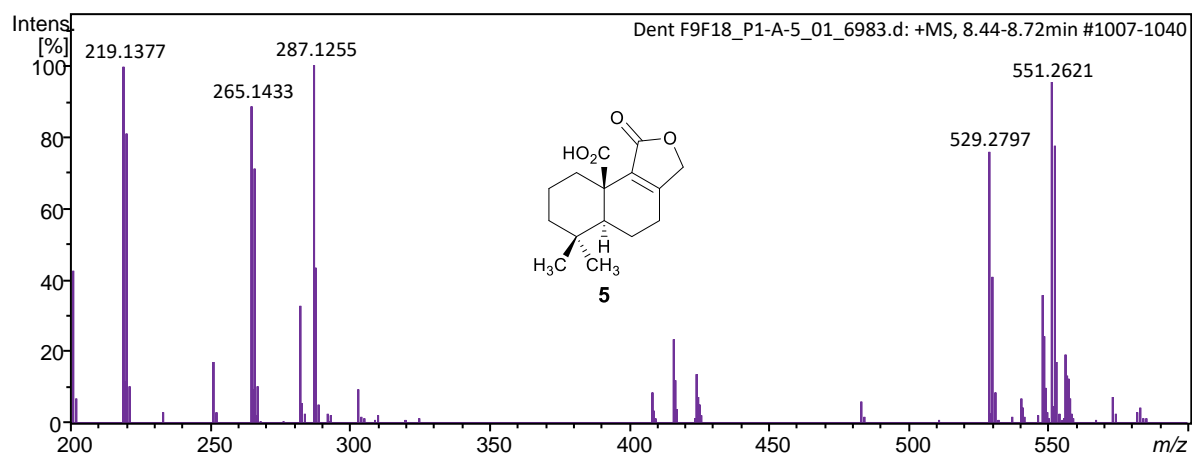

**Figure S48:** HR-(+)ESIMS spectrum of compound 5.

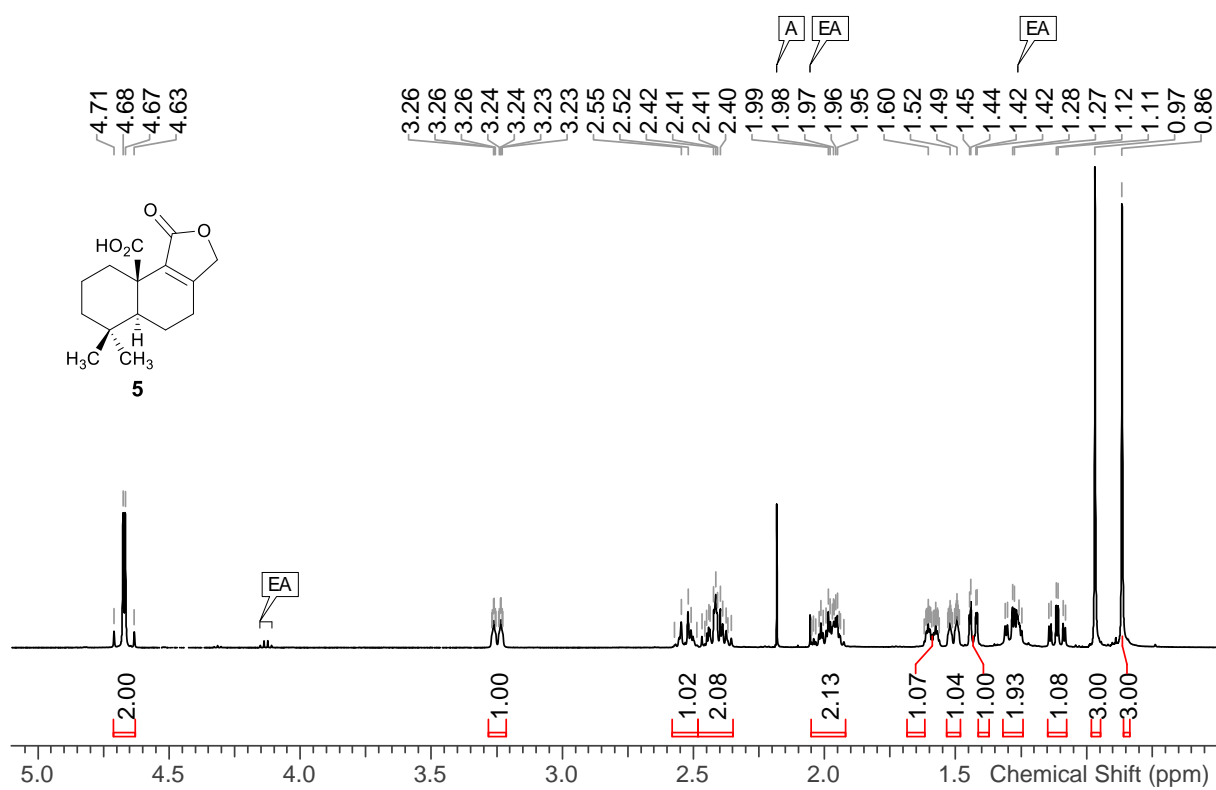

**Figure S49:** <sup>1</sup>H NMR spectrum (500 MHz, CDCl<sub>3</sub>, 298 K) of the purified compound 5. EA: ethyl acetate, A: acetone.

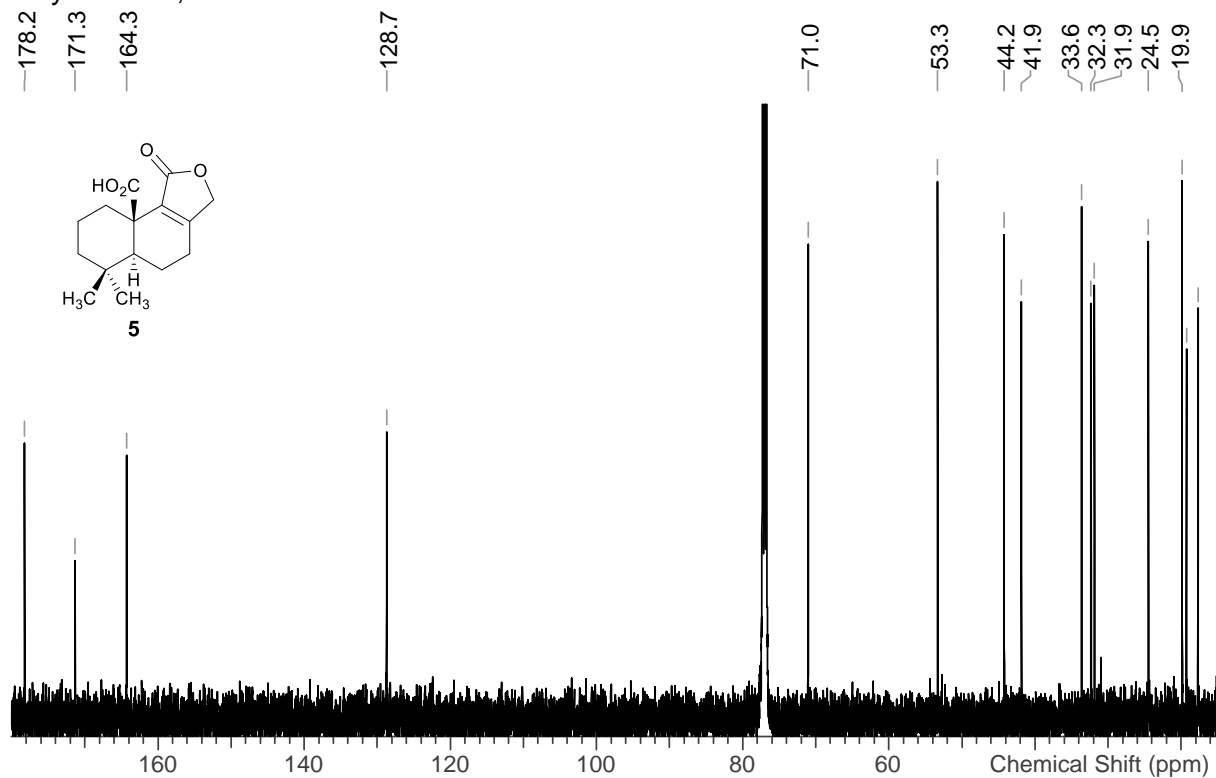

**Figure S50:** <sup>13</sup>C NMR spectrum (125 MHz, CDCl<sub>3</sub>, 298 K) of the purified compound 5. EA: ethyl acetate, A: acetone.

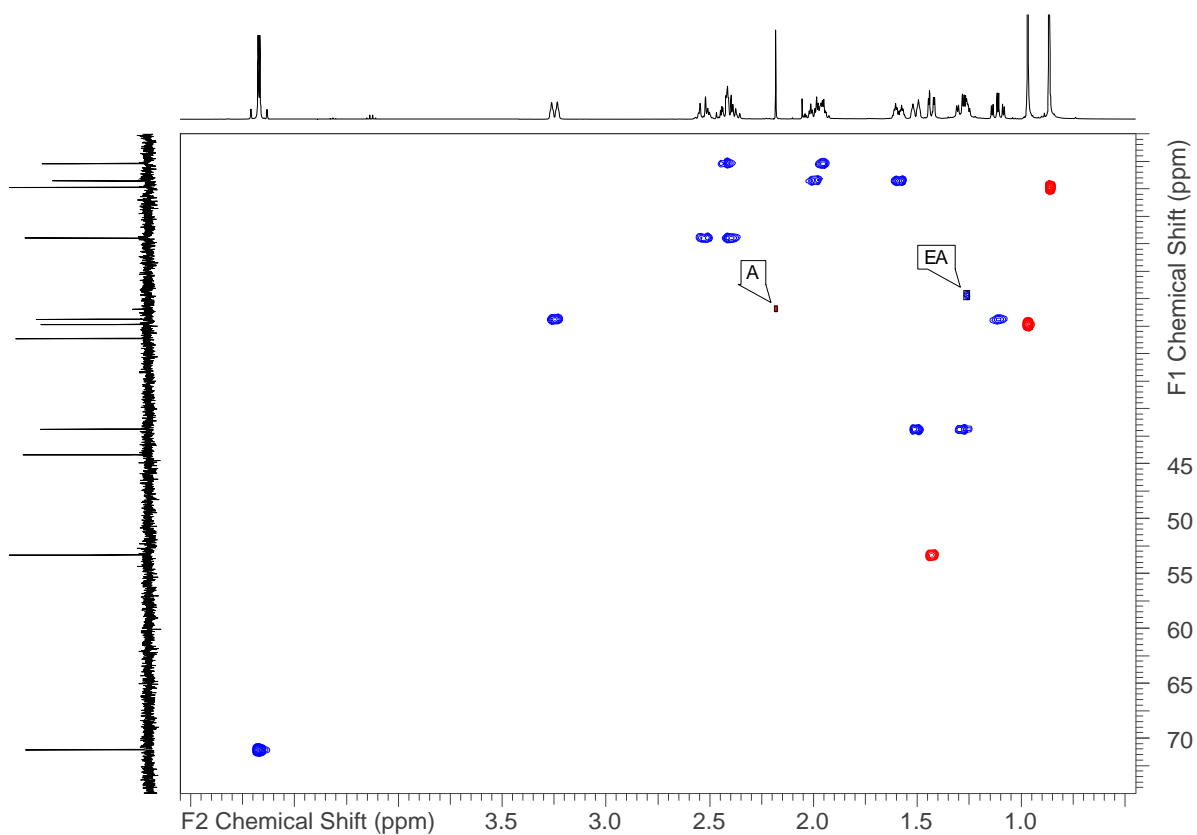

**Figure S51:**  $^1\text{H},^{13}\text{C}$  DEPT-HSQC spectrum (500 MHz,  $\text{CDCl}_3$ , 298 K) of the purified compound **5**.

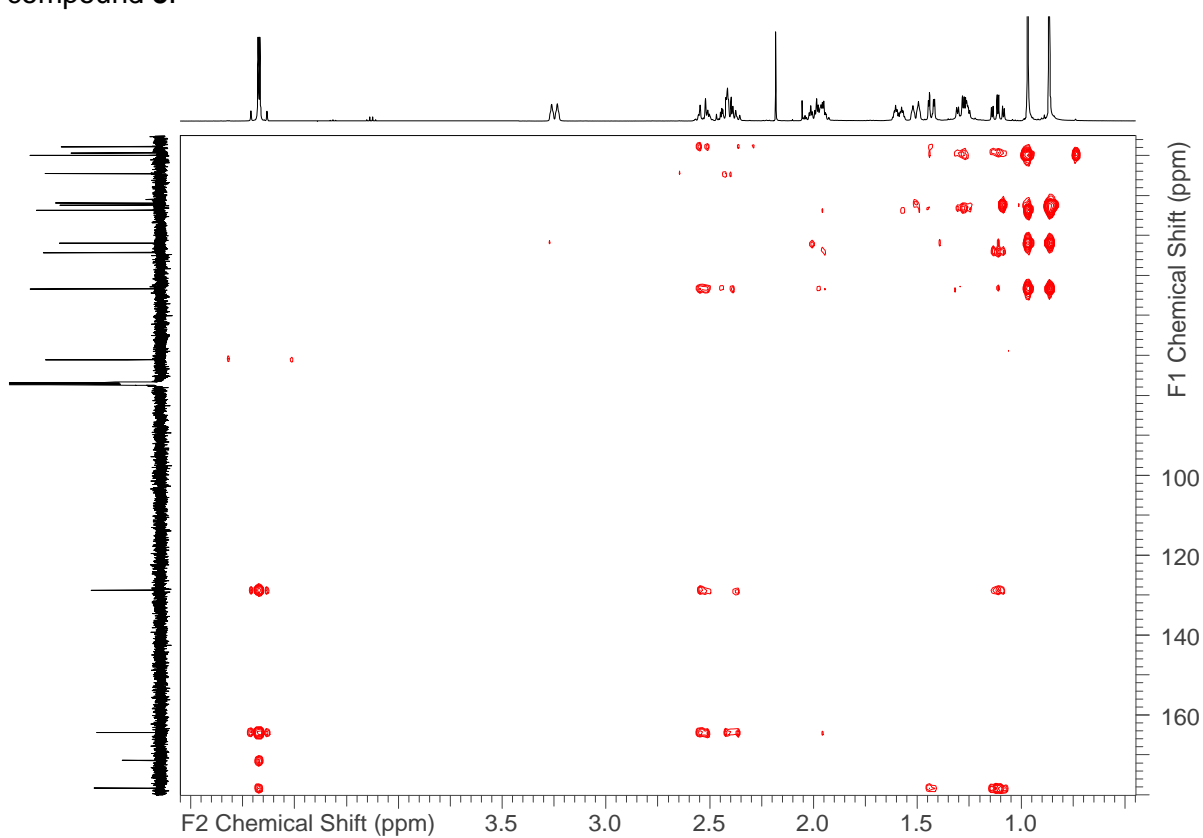

**Figure S52:**  $^1\text{H},^{13}\text{C}$  HMBC spectrum (500 MHz,  $\text{CDCl}_3$ , 298 K) of the purified compound **5**.



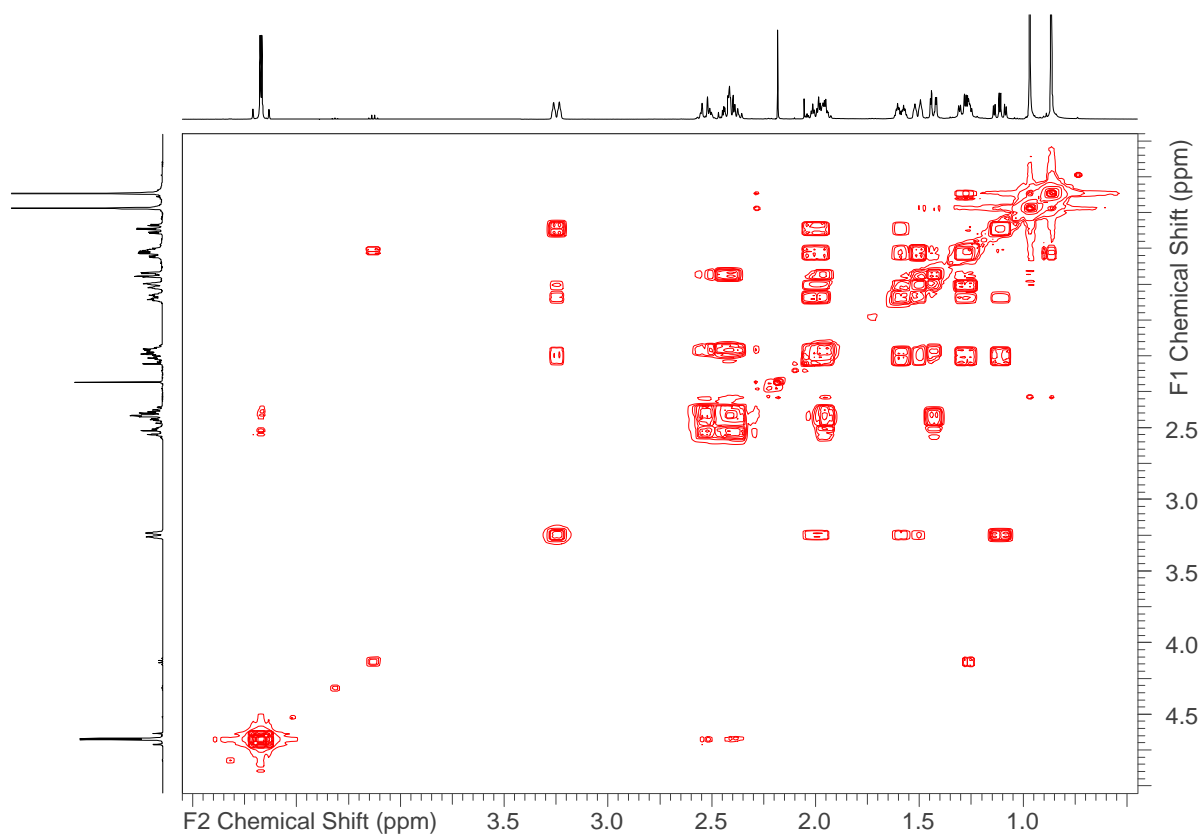

**Figure S53:**  $^1\text{H}$ ,  $^1\text{H}$  COSY spectrum (500 MHz,  $\text{CDCl}_3$ , 298 K) of the purified compound **5**.

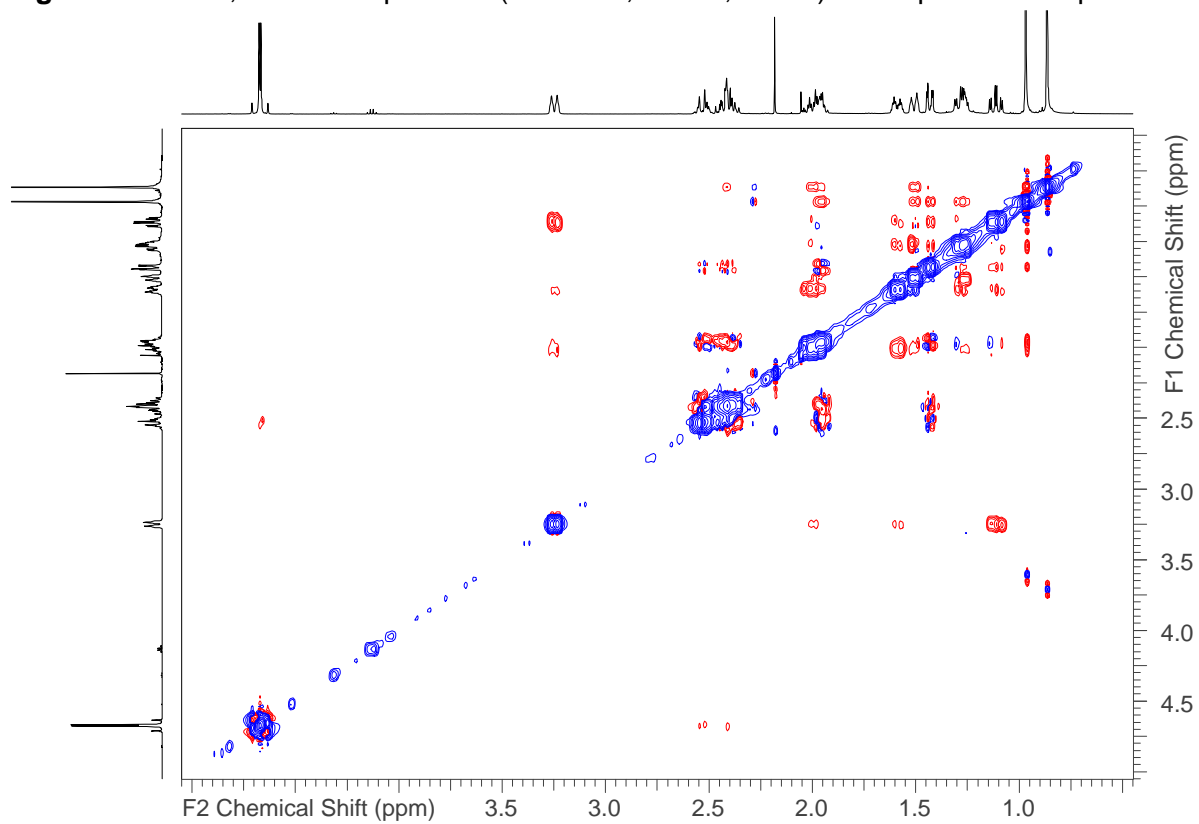

**Figure S54:**  $^1\text{H}$ ,  $^1\text{H}$  ROESY spectrum (500 MHz,  $\text{CDCl}_3$ , 298 K) of the purified compound **5**.

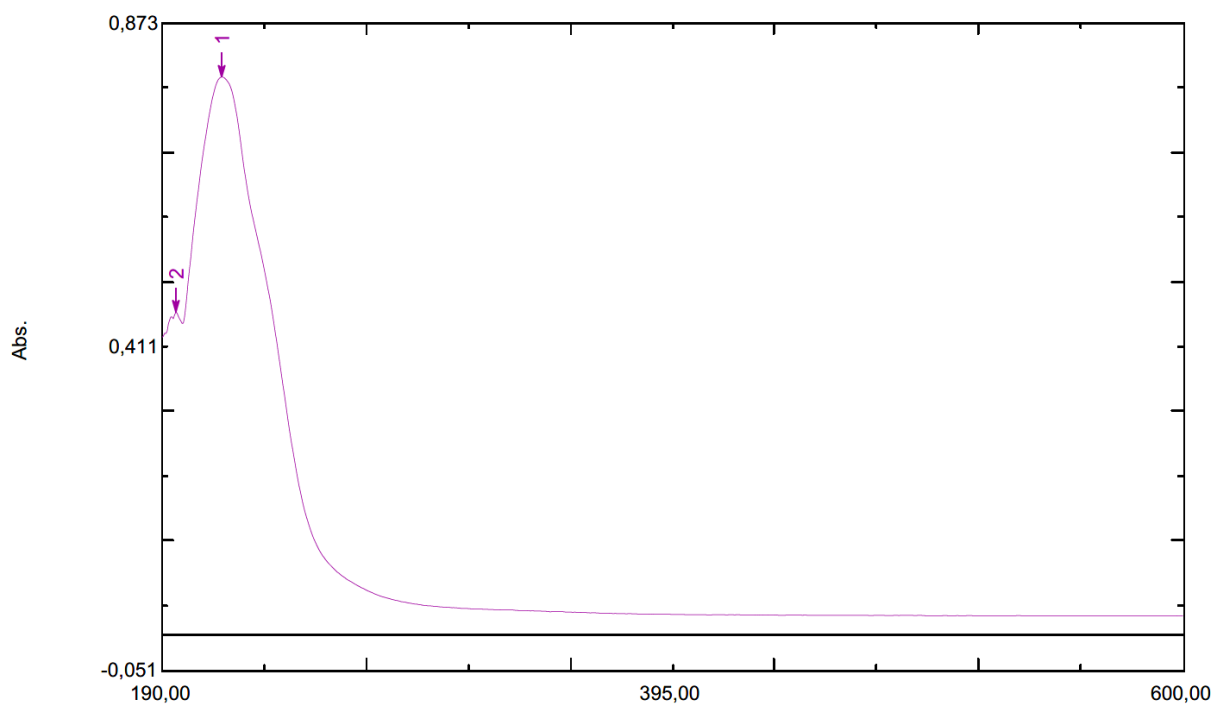

**Figure S55:** UV/Vis spectrum of compound **5** in MeOH.

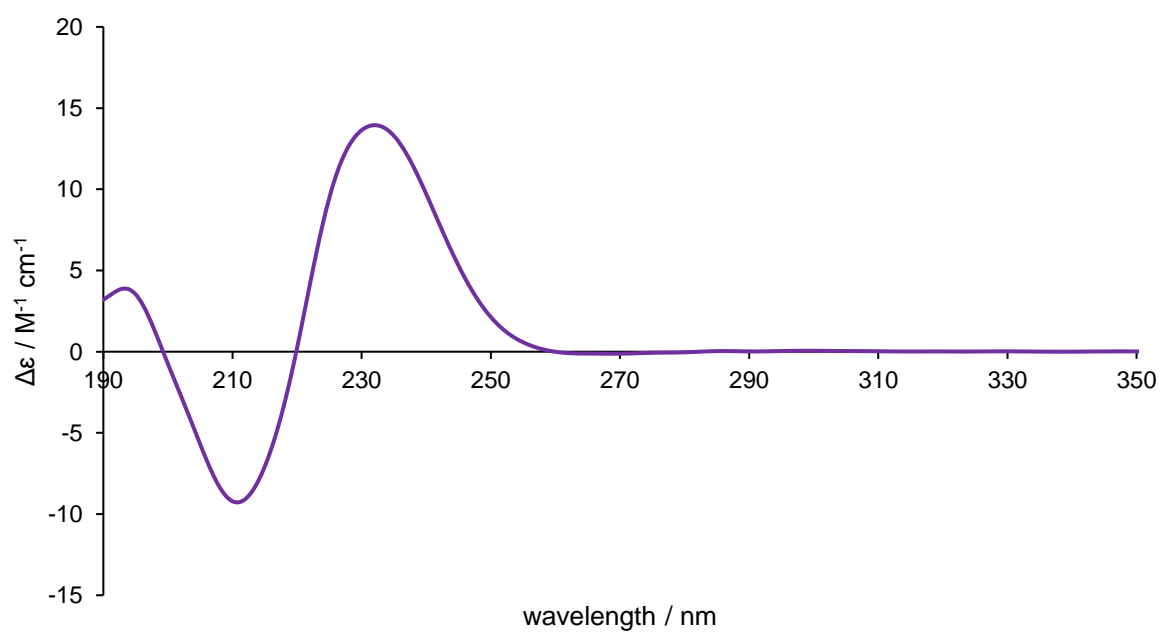

**Figure S56:** ECD spectrum of compound **5** in MeOH.

**(10) Analytical data of compound 6**

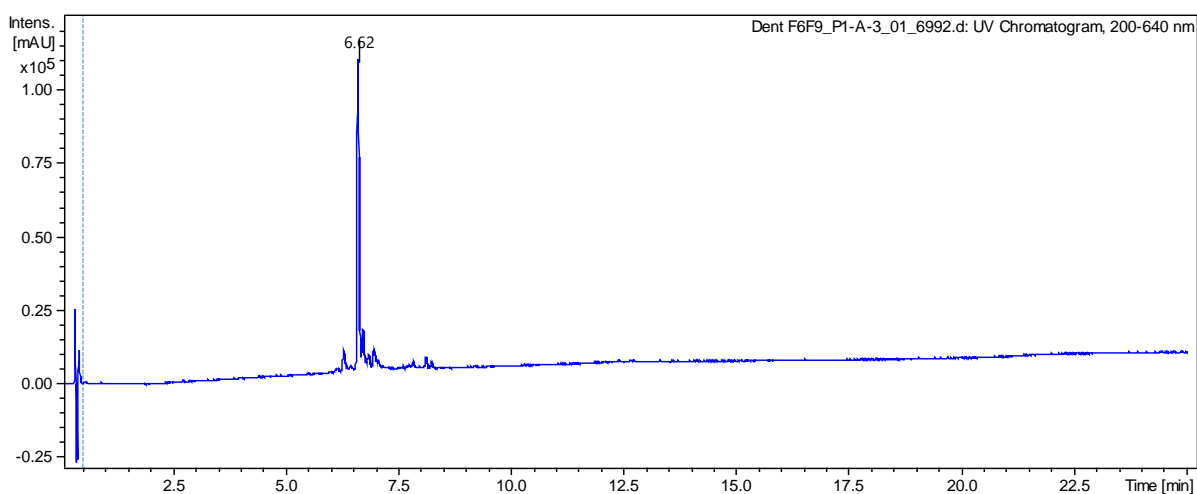

**Figure S57:** HPLC-DAD chromatogram of compound **6**.

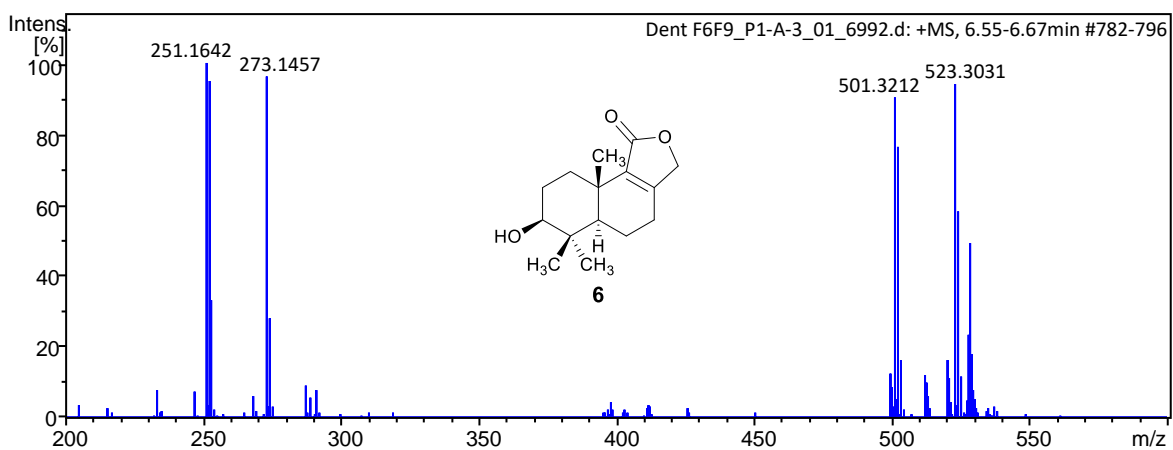

**Figure S58:** HR-(+)ESIMS spectrum of compound **6**.

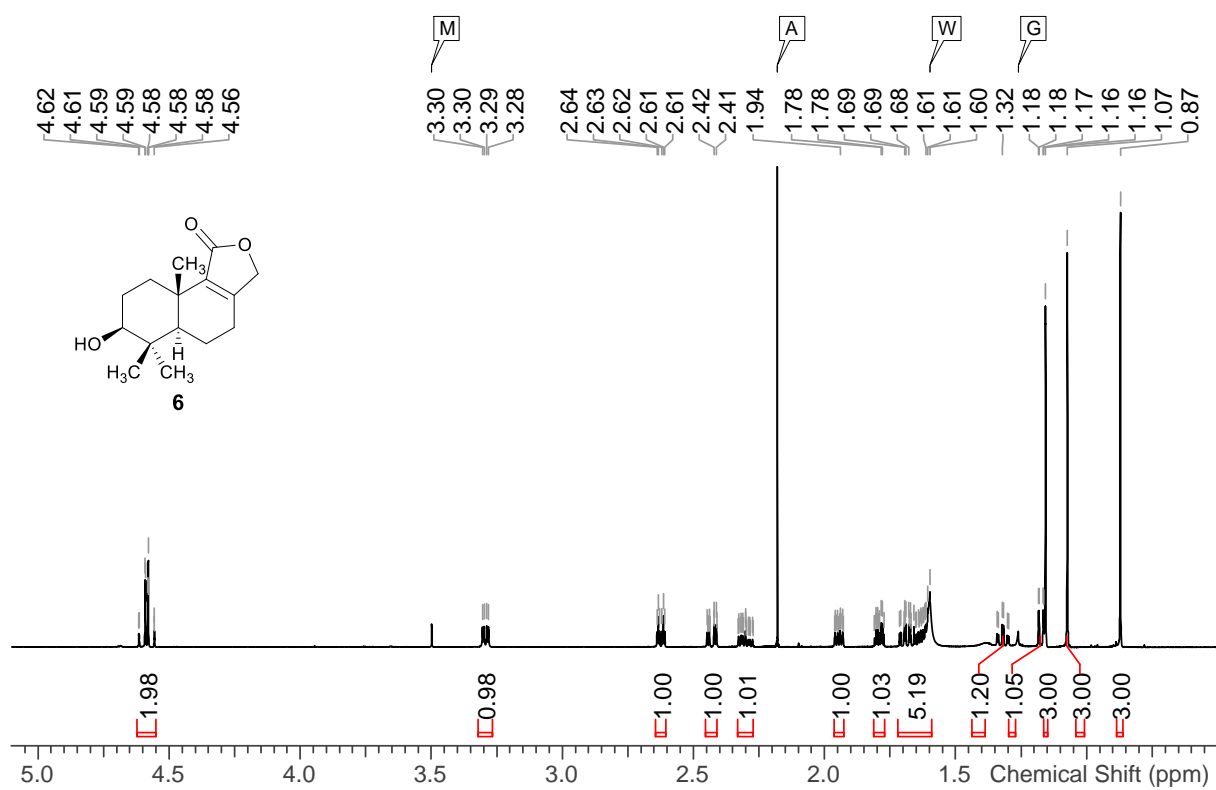

**Figure S59:** <sup>1</sup>H NMR spectrum (700 MHz, CDCl<sub>3</sub>, 298 K) of the purified compound **6**. W: H<sub>2</sub>O, A: acetone, M: methanol, G: grease.

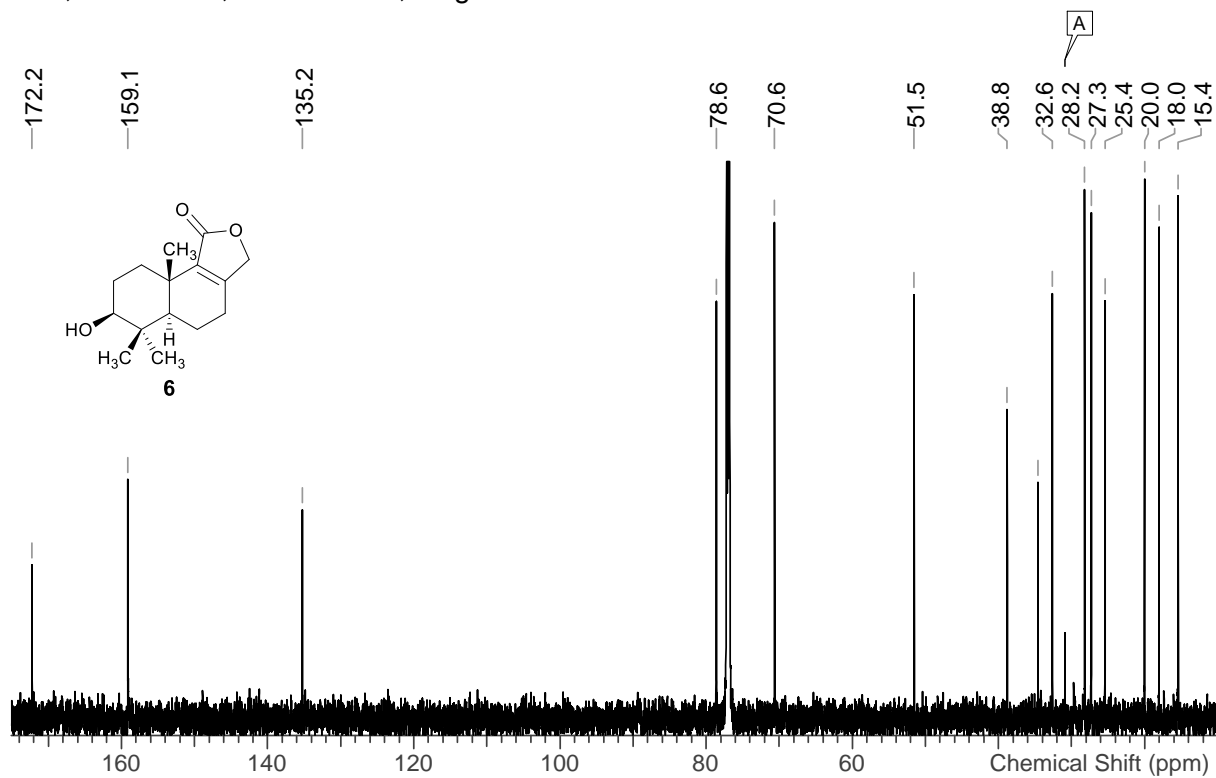

**Figure S60:** <sup>13</sup>C NMR spectrum (175 MHz, CDCl<sub>3</sub>, 298 K) of the purified compound **6**. A: acetone.

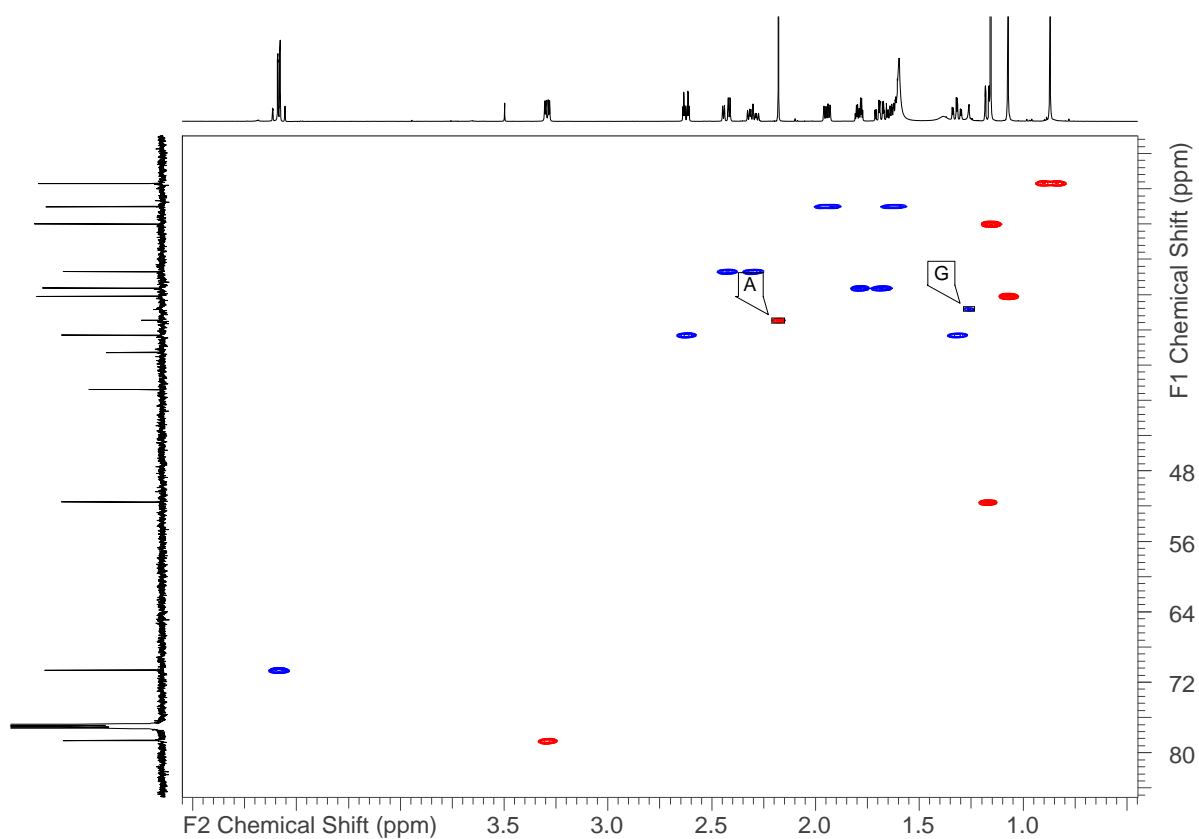

**Figure S61:**  $^1\text{H}$ ,  $^{13}\text{C}$  DEPT-HSQC spectrum (700 MHz,  $\text{CDCl}_3$ , 298 K) of the purified compound **6**.

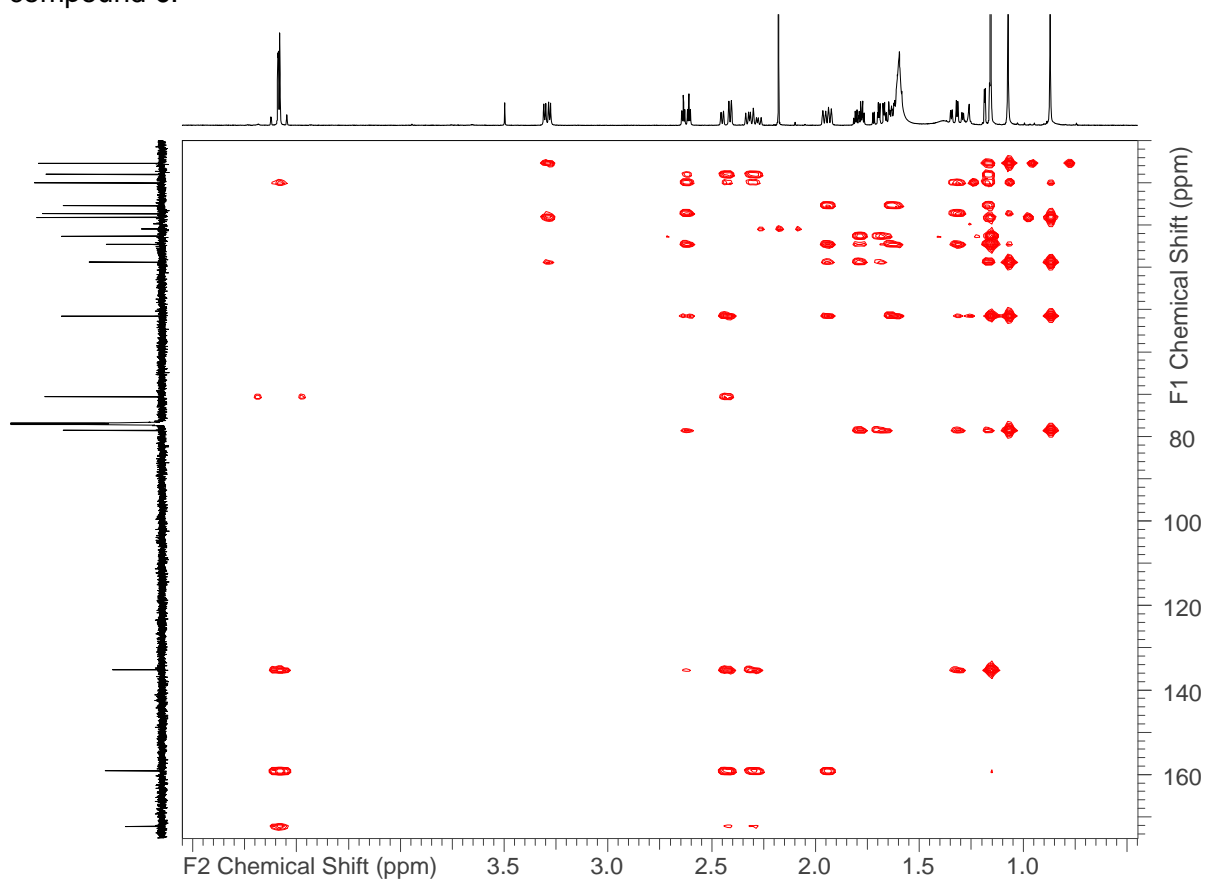

**Figure S62:**  $^1\text{H}$ ,  $^{13}\text{C}$  HMBC spectrum (700 MHz,  $\text{CDCl}_3$ , 298 K) of the purified compound **6**.

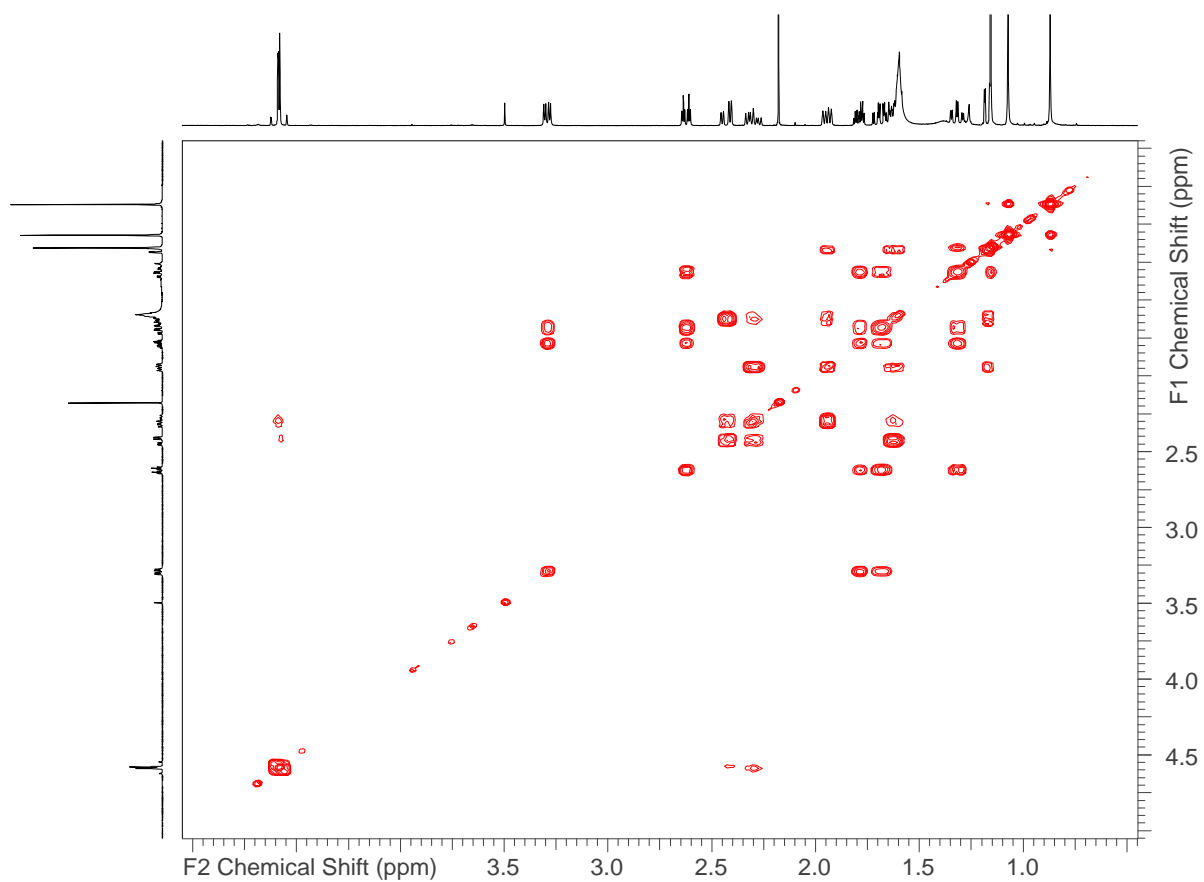

**Figure S63:**  $^1\text{H}$ ,  $^1\text{H}$  COSY spectrum (700 MHz,  $\text{CDCl}_3$ , 298 K) of the purified compound **6**.

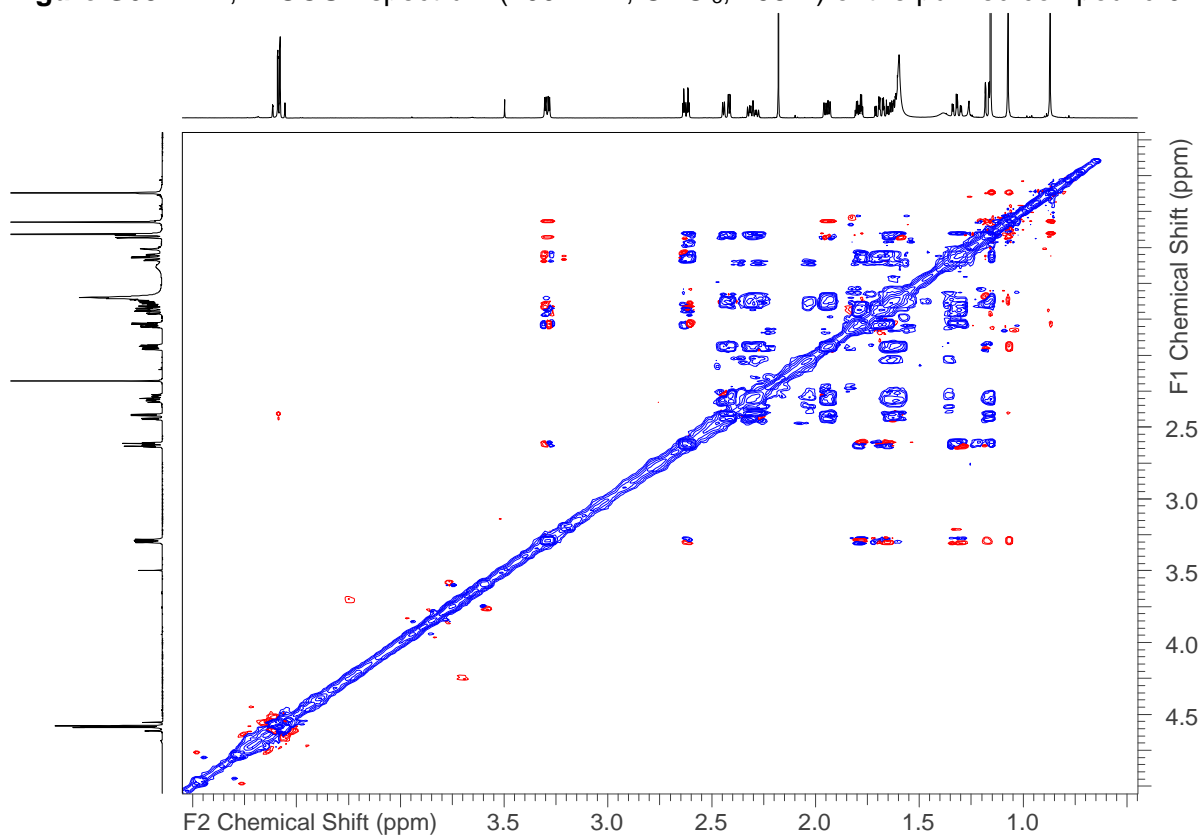

**Figure S64:**  $^1\text{H}$ ,  $^1\text{H}$  ROESY spectrum (500 MHz,  $\text{CDCl}_3$ , 298 K) of the purified compound **6**.

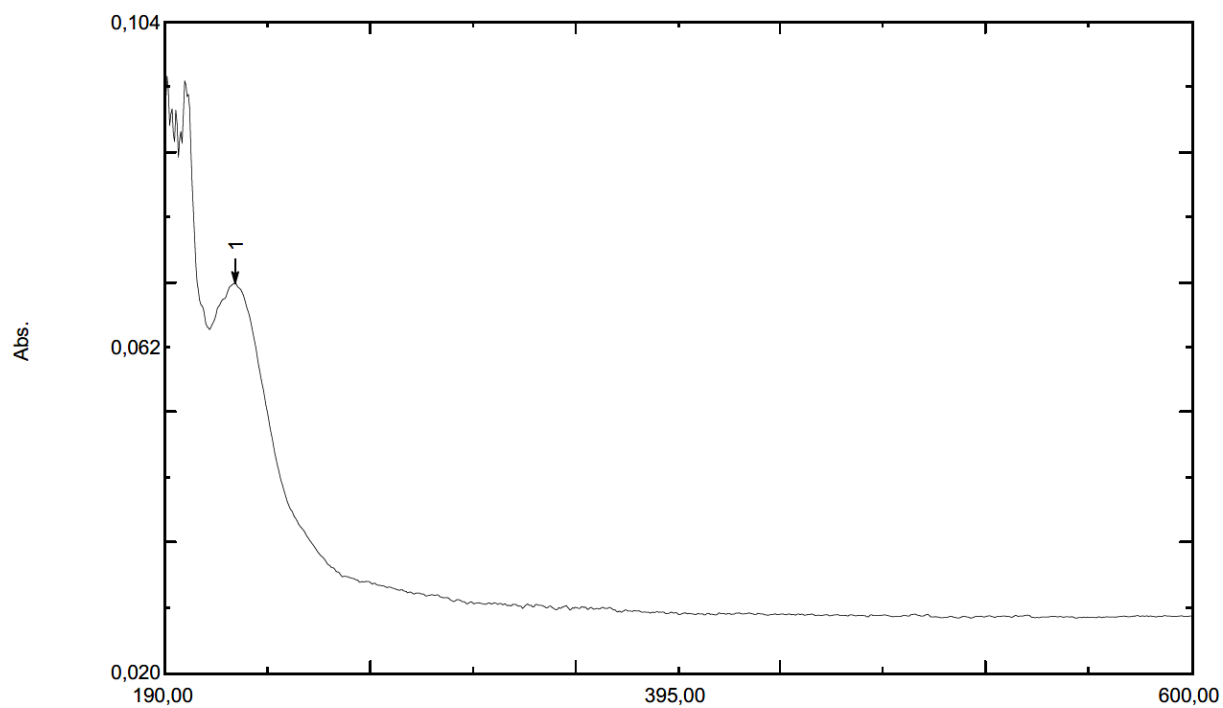

**Figure S65:** UV/Vis spectrum of compound **6** in MeOH.

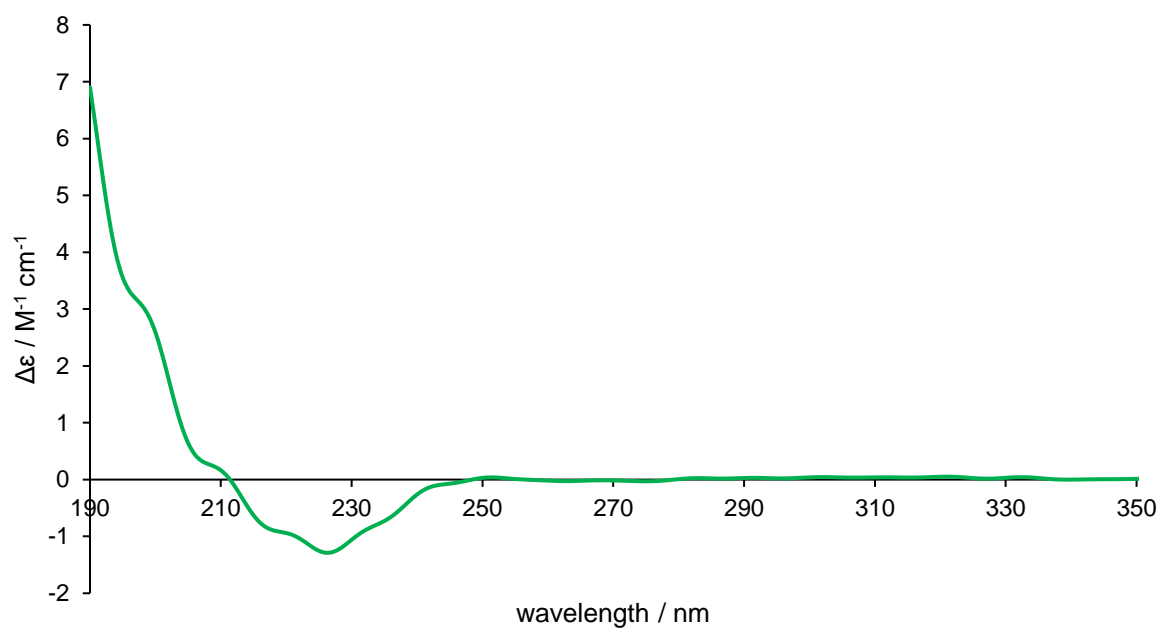

**Figure S66:** ECD spectrum of compound **6** in MeOH.
